# Supplementary material for: PTTG2 silencing results in induction of epithelial-to-mesenchymal transition and apoptosis
Source: PubMed Central journal article supplement — Cell Death Dis. 2013 Mar 7;4(3):e530–. doi: 10.1038/cddis.2013.48 (PMC3613826; doi:10.1038/cddis.2013.48), 2013-03-07
Supplement: cddis201348x7.pdf [file cddis201348x7.pdf]

Supplementary Table 1. Significantly deregulated genes obtained from gene expression analysis of Pttg2-silenced cells ( p value < 0,01 and Linear Fold-change > or = 1.5 ).

| Probe Set ID | mRNA Accession  | mRNA Source | Gene Symbol | mRNA Description                                                                                                                | Linear fold change | Increase/Decrease | p-value (non adjusted) |
|--------------|-----------------|-------------|-------------|---------------------------------------------------------------------------------------------------------------------------------|--------------------|-------------------|------------------------|
| 8020806      | NM_017831       | RefSeq      | RNF125      | Homo sapiens ring finger protein 125 (RNF125), mRNA.                                                                            | 2,5584             | Increase          | 1,01E-05               |
| 8096116      | NM_032717       | RefSeq      | AGPAT9      | Homo sapiens 1-acylglycerol-3-phosphate O-acyltransferase 9 (AGPAT9), mRNA.                                                     | 2,3377             | Increase          | 8,81E-07               |
| 8151890      | NM_033285       | RefSeq      | TP53INP1    | Homo sapiens tumor protein p53 inducible nuclear protein 1 (TP53INP1), transcript variant 1, mRNA.                              | 2,2466             | Increase          | 9,88E-06               |
| 8075322      | NM_001037666    | RefSeq      | GATSL3      | Homo sapiens GATS protein-like 3 (GATSL3), mRNA.                                                                                | 2,2085             | Increase          | 4,24E-05               |
| 8046815      | NM_194250       | RefSeq      | ZNF804A     | Homo sapiens zinc finger protein 804A (ZNF804A), mRNA.                                                                          | 2,1444             | Increase          | 3,17E-05               |
| 7993588      | NM_024847       | RefSeq      | TMC7        | Homo sapiens transmembrane channel-like 7 (TMC7), transcript variant 1, mRNA.                                                   | 2,1230             | Increase          | 2,95E-06               |
| 8043480      | ENST00000455863 | ENSEMBL     | ---         | cdna:pseudogene chromosome:GRCh37:2:91678896:91679403:1 gene:ENSG00000219041                                                    | 2,0819             | Increase          | 9,58E-06               |
| 7936134      | NM_024928       | RefSeq      | OBFC1       | Homo sapiens oligonucleotide/oligosaccharide-binding fold containing 1 (OBFC1), mRNA.                                           | 2,0784             | Increase          | 1,65E-05               |
| 8064978      | NM_000214       | RefSeq      | JAG1        | Homo sapiens jagged 1 (Alagille syndrome) (JAG1), mRNA.                                                                         | 2,0574             | Increase          | 1,03E-05               |
| 8092230      | NM_022470       | RefSeq      | ZMAT3       | Homo sapiens zinc finger, matrin type 3 (ZMAT3), transcript variant 1, mRNA.                                                    | 2,0442             | Increase          | 0,000357766            |
| 8053735      | ENST00000416474 | ENSEMBL     | ---         | cdna:pseudogene chromosome:GRCh37:2:92005801:92006278:1 gene:ENSG00000235235                                                    | 2,0330             | Increase          | 9,54E-06               |
| 8114363      | ENST00000363010 | ENSEMBL     | ---         | ncrna:snRNA chromosome:GRCh37:5:137458697:137458800:-1 gene:ENSG00000199880                                                     | 2,0200             | Increase          | 7,80E-05               |
| 8120967      | NM_002526       | RefSeq      | NT5E        | Homo sapiens 5'-nucleotidase, ecto (CD73) (NT5E), mRNA.                                                                         | 2,0096             | Increase          | 9,97E-06               |
| 7932985      | NM_003873       | RefSeq      | NRP1        | Homo sapiens neuropilin 1 (NRP1), transcript variant 1, mRNA.                                                                   | 1,9934             | Increase          | 5,72E-05               |
| 8159004      | NR_002447       | RefSeq      | SNORD24     | Homo sapiens small nucleolar RNA, C/D box 24 (SNORD24), small nucleolar RNA.                                                    | 1,9357             | Increase          | 0,00746195             |
| 8153002      | NM_001135242    | RefSeq      | NDRG1       | Homo sapiens N-myc downstream regulated 1 (NDRG1), transcript variant 1, mRNA.                                                  | 1,9268             | Increase          | 5,56E-06               |
| 8138289      | NM_004956       | RefSeq      | ETV1        | Homo sapiens ets variant 1 (ETV1), transcript variant 1, mRNA.                                                                  | 1,9149             | Increase          | 4,74E-06               |
| 7949264      | NM_006795       | RefSeq      | EHD1        | Homo sapiens EH-domain containing 1 (EHD1), mRNA.                                                                               | 1,8978             | Increase          | 2,43E-05               |
| 7953211      | NM_020375       | RefSeq      | C12orf5     | Homo sapiens chromosome 12 open reading frame 5 (C12orf5), mRNA.                                                                | 1,8951             | Increase          | 0,000135814            |
| 8161568      | ENST00000457995 | ENSEMBL     | ---         | cdna:pseudogene chromosome:GRCh37:9:69777440:69777956:-1 gene:ENSG00000156755                                                   | 1,8828             | Increase          | 4,04E-05               |
| 8157582      | NM_000177       | RefSeq      | GSN         | Homo sapiens gelsolin (GSN), transcript variant 1, mRNA.                                                                        | 1,8802             | Increase          | 4,59E-06               |
| 8085914      | NM_003615       | RefSeq      | SLC4A7      | Homo sapiens solute carrier family 4, sodium bicarbonate cotransporter, member 7 (SLC4A7), mRNA.                                | 1,8749             | Increase          | 3,56E-05               |
| 7926368      | NM_003380       | RefSeq      | VIM         | Homo sapiens vimentin (VIM), mRNA.                                                                                              | 1,8677             | Increase          | 8,58E-05               |
| 8089467      | NM_024508       | RefSeq      | ZBED2       | Homo sapiens zinc finger, BED-type containing 2 (ZBED2), mRNA.                                                                  | 1,8566             | Increase          | 1,70E-05               |
| 8042576      | NM_017567       | RefSeq      | NAGK        | Homo sapiens N-acetylglucosamine kinase (NAGK), mRNA.                                                                           | 1,8279             | Increase          | 9,34E-06               |
| 8144378      | NM_018361       | RefSeq      | AGPAT5      | Homo sapiens 1-acylglycerol-3-phosphate O-acyltransferase 5 (lysophosphatidic acid acyltransferase, epsilon) (AGPAT5), mRNA.    | 1,8211             | Increase          | 2,65E-05               |
| 8091241      | ---             | ---         | ---         | ---                                                                                                                             | 1,8134             | Increase          | 0,001017358            |
| 8161558      | NR_002817       | RefSeq      | AQP7P1      | Homo sapiens aquaporin 7 pseudogene 1 (AQP7P1), non-coding RNA.                                                                 | 1,8096             | Increase          | 0,000261108            |
| 7935746      | NM_001001342    | RefSeq      | BLOC1S2     | Homo sapiens biogenesis of lysosomal organelles complex-1, subunit 2 (BLOC1S2), transcript variant 2, mRNA.                     | 1,8070             | Increase          | 0,000199414            |
| 8020508      | NM_003831       | RefSeq      | RIOK3       | Homo sapiens RIO kinase 3 (yeast) (RIOK3), mRNA.                                                                                | 1,8009             | Increase          | 0,000163104            |
| 7990345      | NM_003612       | RefSeq      | SEMA7A      | Homo sapiens semaphorin 7A, GPI membrane anchor (John Milton Hagen blood group) (SEMA7A), transcript variant 1, mRNA.           | 1,8000             | Increase          | 1,17E-05               |
| 8161580      | ENST00000457995 | ENSEMBL     | ---         | cdna:pseudogene chromosome:GRCh37:9:69777440:69777956:-1 gene:ENSG00000156755                                                   | 1,7940             | Increase          | 6,54E-05               |
| 8119088      | NM_078467       | RefSeq      | CDKN1A      | Homo sapiens cyclin-dependent kinase inhibitor 1A (p21, Cip1) (CDKN1A), transcript variant 2, mRNA.                             | 1,7931             | Increase          | 1,07E-05               |
| 7899436      | NM_031459       | RefSeq      | SESN2       | Homo sapiens sestrin 2 (SESN2), mRNA.                                                                                           | 1,7897             | Increase          | 0,000107889            |
| 8121257      | NM_001198       | RefSeq      | PRDM1       | Homo sapiens PR domain containing 1, with ZNF domain (PRDM1), transcript variant 1, mRNA.                                       | 1,7864             | Increase          | 3,74E-05               |
| 8126102      | NM_153487       | RefSeq      | MDGA1       | Homo sapiens MAM domain containing glycosylphosphatidylinositol anchor 1 (MDGA1), mRNA.                                         | 1,7851             | Increase          | 3,46E-05               |
| 8086729      | NM_182902       | RefSeq      | KIF9        | Homo sapiens kinesin family member 9 (KIF9), transcript variant 2, mRNA.                                                        | 1,7815             | Increase          | 8,15E-05               |
| 7999423      | NM_003745       | RefSeq      | SOCS1       | Homo sapiens suppressor of cytokine signaling 1 (SOCS1), mRNA.                                                                  | 1,7794             | Increase          | 0,000246994            |
| 8116998      | NM_004973       | RefSeq      | JARID2      | Homo sapiens jumonji, AT rich interactive domain 2 (JARID2), mRNA.                                                              | 1,7771             | Increase          | 8,86E-05               |
| 7979984      | NM_021260       | RefSeq      | ZFYVE1      | Homo sapiens zinc finger, FYVE domain containing 1 (ZFYVE1), transcript variant 1, mRNA.                                        | 1,7751             | Increase          | 9,51E-06               |
| 8025893      | ENST00000365487 | ENSEMBL     | ---         | ncrna:misc_RNA chromosome:GRCh37:19:11519448:11519556:1 gene:ENSG00000202357                                                    | 1,7590             | Increase          | 0,009767329            |
| 8161563      | ENST00000457995 | ENSEMBL     | ---         | cdna:pseudogene chromosome:GRCh37:9:69777440:69777956:-1 gene:ENSG00000156755                                                   | 1,7521             | Increase          | 0,00023957             |
| 8094476      | NM_018317       | RefSeq      | TBC1D19     | Homo sapiens TBC1 domain family, member 19 (TBC1D19), mRNA.                                                                     | 1,7477             | Increase          | 4,52E-05               |
| 8018236      | NM_024417       | RefSeq      | FDXR        | Homo sapiens ferredoxin reductase (FDXR), nuclear gene encoding mitochondrial protein, transcript variant 1, mRNA.              | 1,7448             | Increase          | 6,39E-05               |
| 8140534      | NM_006379       | RefSeq      | SEMA3C      | Homo sapiens sema domain, immunoglobulin domain (Ig), short basic domain, secreted, (semaphorin) 3C (SEMA3C), mRNA.             | 1,7448             | Increase          | 0,000334513            |
| 8136807      | NM_002770       | RefSeq      | PRSS2       | Homo sapiens protease, serine, 2 (trypsin 2) (PRSS2), mRNA.                                                                     | 1,7413             | Increase          | 0,004517524            |
| 8043484      | ENST00000416474 | ENSEMBL     | ---         | cdna:pseudogene chromosome:GRCh37:2:92005801:92006278:1 gene:ENSG00000235235                                                    | 1,7403             | Increase          | 7,72E-05               |
| 7967028      | NR_003137       | RefSeq      | RNU4-2      | Homo sapiens RNA, U4 small nuclear 2 (RNU4-2), small nuclear RNA.                                                               | 1,7396             | Increase          | 0,000902909            |
| 8160663      | NM_001170       | RefSeq      | AQP7        | Homo sapiens aquaporin 7 (AQP7), mRNA.                                                                                          | 1,7374             | Increase          | 0,001083636            |
| 7987470      | ---             | ---         | ---         | ---                                                                                                                             | 1,7275             | Increase          | 0,002274212            |
| 7918284      | NM_005645       | RefSeq      | TAF13       | Homo sapiens TAF13 RNA polymerase II, TATA box binding protein (TBP)-associated factor, 18kDa (TAF13), mRNA.                    | 1,7249             | Increase          | 0,001585446            |
| 8040927      | NM_013392       | RefSeq      | NRBP1       | Homo sapiens nuclear receptor binding protein 1 (NRBP1), mRNA.                                                                  | 1,7200             | Increase          | 1,22E-05               |
| 8057599      | NM_006287       | RefSeq      | TFPI        | Homo sapiens tissue factor pathway inhibitor (lipoprotein-associated coagulation inhibitor) (TFPI), transcript variant 1, mRNA. | 1,7172             | Increase          | 0,000336356            |
| 8129677      | NM_001143676    | RefSeq      | SGK1        | Homo sapiens serum/glucocorticoid regulated kinase 1 (SGK1), transcript variant 2, mRNA.                                        | 1,7123             | Increase          | 1,96E-05               |
| 8009353      | NM_181671       | RefSeq      | PITPNC1     | Homo sapiens phosphatidylinositol transfer protein, cytoplasmic 1 (PITPNC1), transcript variant 2, mRNA.                        | 1,7058             | Increase          | 2,57E-05               |
| 7898721      | ENST00000410305 | ENSEMBL     | ---         | ncrna:misc_RNA chromosome:GRCh37:1:22313974:22314268:1 gene:ENSG00000222237                                                     | 1,7041             | Increase          | 0,002486043            |
| 7981514      | NM_138420       | RefSeq      | AHNAK2      | Homo sapiens AHNAK nucleoprotein 2 (AHNAK2), mRNA.                                                                              | 1,6962             | Increase          | 0,001750123            |
| 7996883      | NM_005329       | RefSeq      | HAS3        | Homo sapiens hyaluronan synthase 3 (HAS3), transcript variant 1, mRNA.                                                          | 1,6958             | Increase          | 4,97E-05               |
| 7938396      | NM_000480       | RefSeq      | AMPD3       | Homo sapiens adenosine monophosphate deaminase 3 (AMPD3), transcript variant 1, mRNA.                                           | 1,6949             | Increase          | 0,000132608            |
| 8037408      | NM_002250       | RefSeq      | KCNN4       | Homo sapiens potassium intermediate/small conductance calcium-activated channel, subfamily N, member 4 (KCNN4), mRNA.           | 1,6861             | Increase          | 8,37E-05               |
| 8009951      | NM_000213       | RefSeq      | ITGB4       | Homo sapiens integrin, beta 4 (ITGB4), transcript variant 1, mRNA.                                                              | 1,6807             | Increase          | 0,00024094             |
| 8155442      | NR_002817       | RefSeq      | AQP7P1      | Homo sapiens aquaporin 7 pseudogene 1 (AQP7P1), non-coding RNA.                                                                 | 1,6769             | Increase          | 4,86E-05               |
| 8142079      | NM_021930       | RefSeq      | RINT1       | Homo sapiens RAD50 interactor 1 (RINT1), mRNA.                                                                                  | 1,6755             | Increase          | 0,000254756            |

| Probe Set ID | mRNA Accession  | mRNA Source | Gene Symbol | mRNA Description                                                                                                          | Linear fold change | Increase/Decrease | p-value (non adjusted) |
|--------------|-----------------|-------------|-------------|---------------------------------------------------------------------------------------------------------------------------|--------------------|-------------------|------------------------|
| 8161488      | NR_002817       | RefSeq      | AQP7P1      | Homo sapiens aquaporin 7 pseudogene 1 (AQP7P1), non-coding RNA.                                                           | 1.6673             | Increase          | 9.64E-05               |
| 8086538      | BC047037        | GenBank     | LOC644714   | Homo sapiens, clone IMAGE:5168377, mRNA.                                                                                  | 1.6602             | Increase          | 0.007332501            |
| 7977075      | NR_002964       | RefSeq      | SNORA28     | Homo sapiens small nucleolar RNA, H/ACA box 28 (SNORA28), small nucleolar RNA.                                            | 1.6554             | Increase          | 0.002225281            |
| 8044375      | NM_138621       | RefSeq      | BCL2L11     | Homo sapiens BCL2-like 11 (apoptosis facilitator) (BCL2L11), transcript variant 1, mRNA.                                  | 1.6495             | Increase          | 5.11E-05               |
| 7982845      | NM_020857       | RefSeq      | VPS18       | Homo sapiens vacuolar protein sorting 18 homolog (S. cerevisiae) (VPS18), mRNA.                                           | 1.6473             | Increase          | 5.82E-05               |
| 7972557      | NM_004951       | RefSeq      | GPR183      | Homo sapiens G protein-coupled receptor 183 (GPR183), mRNA.                                                               | 1.6451             | Increase          | 0.000685141            |
| 8112176      | NR_023344       | RefSeq      | RNU6ATAC    | Homo sapiens RNA, U6atac small nuclear (U12-dependent splicing) (RNU6ATAC), small nuclear RNA.                            | 1.6434             | Increase          | 0.005471457            |
| 8138566      | NM_006547       | RefSeq      | IGF2BP3     | Homo sapiens insulin-like growth factor 2 mRNA binding protein 3 (IGF2BP3), mRNA.                                         | 1.6430             | Increase          | 3.08E-05               |
| 8123717      | NM_006638       | RefSeq      | RPP40       | Homo sapiens ribonuclease P/MRP 40kDa subunit (RPP40), mRNA.                                                              | 1.6425             | Increase          | 0.000209209            |
| 8125766      | NM_001188       | RefSeq      | BAK1        | Homo sapiens BCL2-antagonist/killer 1 (BAK1), mRNA.                                                                       | 1.6416             | Increase          | 0.003771872            |
| 7919584      | NM_001024599    | RefSeq      | HIST2H2BF   | Homo sapiens histone cluster 2, H2bf (HIST2H2BF), transcript variant 1, mRNA.                                             | 1.6411             | Increase          | 0.000389264            |
| 8122816      | ENST00000411107 | ENSEMBL     | ---         | ncrna:misc_RNA chromosome:GRCh37:6:151640770:151641085:1 gene:ENSG00000223039                                             | 1.6395             | Increase          | 0.008527213            |
| 8104348      | ---             | ---         | ---         | ---                                                                                                                       | 1.6377             | Increase          | 0.001029416            |
| 8152355      | NM_001099750    | RefSeq      | SYBU        | Homo sapiens syntabulin (syntaxin-interacting) (SYBU), transcript variant 4, mRNA.                                        | 1.6364             | Increase          | 4.71E-05               |
| 7973743      | ENST00000355069 | ENSEMBL     | BNIP3       | BCL2/adenovirus E1B 19 kDa protein-interacting protein 3 gene:ENSG00000197358                                             | 1.6341             | Increase          | 0.003880251            |
| 7983951      | ---             | ---         | ---         | ---                                                                                                                       | 1.6331             | Increase          | 0.00759167             |
| 8049299      | NR_003006       | RefSeq      | SCARNA6     | Homo sapiens small Cajal body-specific RNA 6 (SCARNA6), guide RNA.                                                        | 1.6312             | Increase          | 0.001760228            |
| 8063313      | ENST00000437218 | ENSEMBL     | ---         | cdna:pseudogene chromosome:GRCh37:20:47751017:47751549:1 gene:ENSG00000226284                                             | 1.6294             | Increase          | 0.000636637            |
| 8128698      | NM_014454       | RefSeq      | SESN1       | Homo sapiens sestrin 1 (SESN1), mRNA.                                                                                     | 1.6273             | Increase          | 0.000449961            |
| 7929032      | NM_000043       | RefSeq      | FAS         | Homo sapiens Fas (TNF receptor superfamily, member 6) (FAS), transcript variant 1, mRNA.                                  | 1.6255             | Increase          | 7.49E-05               |
| 8155554      | NR_002817       | RefSeq      | AQP7P1      | Homo sapiens aquaporin 7 pseudogene 1 (AQP7P1), non-coding RNA.                                                           | 1.6234             | Increase          | 4.14E-05               |
| 8015337      | NM_002275       | RefSeq      | KRT15       | Homo sapiens keratin 15 (KRT15), mRNA.                                                                                    | 1.6147             | Increase          | 7.79E-05               |
| 8021150      | ENST00000432117 | ENSEMBL     | ---         | cdna:pseudogene chromosome:GRCh37:18:45156483:45157223:1 gene:ENSG00000223790                                             | 1.6122             | Increase          | 0.000719668            |
| 8015835      | NM_004090       | RefSeq      | DUSP3       | Homo sapiens dual specificity phosphatase 3 (DUSP3), mRNA.                                                                | 1.6036             | Increase          | 8.05E-05               |
| 8005707      | NM_145109       | RefSeq      | MAP2K3      | Homo sapiens mitogen-activated protein kinase kinase 3 (MAP2K3), transcript variant B, mRNA.                              | 1.6031             | Increase          | 5.57E-05               |
| 8136372      | NM_002581       | RefSeq      | PAPPA       | Homo sapiens pregnancy-associated plasma protein A, pappalysin 1 (PAPPA), mRNA.                                           | 1.5995             | Increase          | 0.00433308             |
| 8049487      | NM_024101       | RefSeq      | MLPH        | Homo sapiens melanophilin (MLPH), transcript variant 1, mRNA.                                                             | 1.5981             | Increase          | 7.98E-05               |
| 7957604      | ENST00000410468 | ENSEMBL     | ---         | ncrna:misc_RNA chromosome:GRCh37:12:94909252:94909532:1 gene:ENSG00000224400                                              | 1.5963             | Increase          | 0.002036597            |
| 7966229      | NR_026661       | RefSeq      | MGC14436    | Homo sapiens hypothetical LOC84983 (MGC14436), transcript variant 1, non-coding RNA.                                      | 1.5915             | Increase          | 0.001912567            |
| 8066431      | NM_000022       | RefSeq      | ADA         | Homo sapiens adenosine deaminase (ADA), mRNA.                                                                             | 1.5889             | Increase          | 0.000702604            |
| 8136801      | NR_001296       | RefSeq      | TRY6        | Homo sapiens trypsinogen C (TRY6), non-coding RNA.                                                                        | 1.5883             | Increase          | 0.005389993            |
| 8100328      | NM_022832       | RefSeq      | USP46       | Homo sapiens ubiquitin specific peptidase 46 (USP46), transcript variant 1, mRNA.                                         | 1.5869             | Increase          | 0.000445033            |
| 7966299      | ENST00000411405 | ENSEMBL     | ---         | ncrna:misc_RNA chromosome:GRCh37:12:110798255:110798551:-1 gene:ENSG00000223337                                           | 1.5849             | Increase          | 0.002892134            |
| 8062041      | NM_018677       | RefSeq      | ACSS2       | Homo sapiens acyl-CoA synthetase short-chain family member 2 (ACSS2), transcript variant 1, mRNA.                         | 1.5836             | Increase          | 0.000159413            |
| 8149749      | NM_003840       | RefSeq      | TNFRSF10D   | Homo sapiens tumor necrosis factor receptor superfamily, member 10d, decoy with truncated death domain (TNFRSF10D), mRNA. | 1.5831             | Increase          | 5.74E-05               |
| 8123884      | NR_026737       | RefSeq      | C6orf52     | Homo sapiens chromosome 6 open reading frame 52 (C6orf52), transcript variant 3, non-coding RNA.                          | 1.5781             | Increase          | 0.005688267            |
| 8040365      | NM_021643       | RefSeq      | TRIB2       | Homo sapiens tribbles homolog 2 (Drosophila) (TRIB2), transcript variant 1, mRNA.                                         | 1.5744             | Increase          | 0.001178872            |
| 8097096      | ---             | ---         | ---         | ---                                                                                                                       | 1.5715             | Increase          | 0.004343199            |
| 8126820      | NM_153840       | RefSeq      | GPR110      | Homo sapiens G protein-coupled receptor 110 (GPR110), transcript variant 1, mRNA.                                         | 1.5714             | Increase          | 0.00047719             |
| 8057742      | ---             | ---         | ---         | ---                                                                                                                       | 1.5714             | Increase          | 0.002314508            |
| 8023968      | NM_004359       | RefSeq      | CDC34       | Homo sapiens cell division cycle 34 homolog (S. cerevisiae) (CDC34), mRNA.                                                | 1.5714             | Increase          | 0.000143388            |
| 8121212      | ENST00000413107 | ENSEMBL     | ---         | cdna:pseudogene chromosome:GRCh37:6:99622620:99623357:1 gene:ENSG00000232699                                              | 1.5713             | Increase          | 0.004453151            |
| 8160912      | NM_203299       | RefSeq      | C9orf131    | Homo sapiens chromosome 9 open reading frame 131 (C9orf131), transcript variant 1, mRNA.                                  | 1.5683             | Increase          | 0.002969059            |
| 7923772      | NM_001001552    | RefSeq      | LEMD1       | Homo sapiens LEM domain containing 1 (LEMD1), mRNA.                                                                       | 1.5660             | Increase          | 0.001746988            |
| 8026024      | NM_004317       | RefSeq      | ASNA1       | Homo sapiens arsA arsenite transporter, ATP-binding, homolog 1 (bacterial) (ASNA1), mRNA.                                 | 1.5626             | Increase          | 9.49E-05               |
| 8090565      | NR_002992       | RefSeq      | SNORA7B     | Homo sapiens small nucleolar RNA, H/ACA box 7B (SNORA7B), small nucleolar RNA.                                            | 1.5612             | Increase          | 0.002190152            |
| 8093852      | NM_002448       | RefSeq      | MSX1        | Homo sapiens msh homeobox 1 (MSX1), mRNA.                                                                                 | 1.5598             | Increase          | 6.90E-05               |
| 7989493      | NM_015920       | RefSeq      | RPS27L      | Homo sapiens ribosomal protein S27-like (RPS27L), mRNA.                                                                   | 1.5561             | Increase          | 0.006057917            |
| 8124492      | NM_080593       | RefSeq      | HIST1H2BK   | Homo sapiens histone cluster 1, H2bk (HIST1H2BK), mRNA.                                                                   | 1.5558             | Increase          | 0.000263314            |
| 8138834      | NM_017946       | RefSeq      | FKBP14      | Homo sapiens FK506 binding protein 14, 22 kDa (FKBP14), mRNA.                                                             | 1.5558             | Increase          | 5.27E-05               |
| 8032392      | NM_199054       | RefSeq      | MKNK2       | Homo sapiens MAP kinase interacting serine/threonine kinase 2 (MKNK2), transcript variant 2, mRNA.                        | 1.5534             | Increase          | 4.54E-05               |
| 8065990      | ---             | ---         | ---         | ---                                                                                                                       | 1.5508             | Increase          | 0.002386885            |
| 8032749      | NR_002602       | RefSeq      | SNORD37     | Homo sapiens small nucleolar RNA, C/D box 37 (SNORD37), small nucleolar RNA.                                              | 1.5505             | Increase          | 0.003658184            |
| 8095802      | NM_018115       | RefSeq      | SDAD1       | Homo sapiens SDA1 domain containing 1 (SDAD1), mRNA.                                                                      | 1.5498             | Increase          | 0.006529178            |
| 8171561      | NM_006089       | RefSeq      | SCML2       | Homo sapiens sex comb on midleg-like 2 (Drosophila) (SCML2), mRNA.                                                        | 1.5475             | Increase          | 0.000136831            |
| 8091078      | NM_002899       | RefSeq      | RBP1        | Homo sapiens retinol binding protein 1, cellular (RBP1), transcript variant 1, mRNA.                                      | 1.5468             | Increase          | 0.001267185            |
| 8030823      | NM_001101372    | RefSeq      | IGLON5      | Homo sapiens IgLON family member 5 (IGLON5), mRNA.                                                                        | 1.5429             | Increase          | 0.001018769            |
| 8109528      | NM_001037332    | RefSeq      | CYFIP2      | Homo sapiens cytoplasmic FMR1 interacting protein 2 (CYFIP2), transcript variant 2, mRNA.                                 | 1.5404             | Increase          | 0.001493937            |
| 8088172      | ---             | ---         | ---         | ---                                                                                                                       | 1.5396             | Increase          | 0.006769921            |
| 8045931      | ENST00000410673 | ENSEMBL     | ---         | ncrna:misc_RNA chromosome:GRCh37:2:161734058:161734359:1 gene:ENSG00000222605                                             | 1.5376             | Increase          | 0.009951904            |
| 7919305      | NM_005399       | RefSeq      | PRKAB2      | Homo sapiens protein kinase, AMP-activated, beta 2 non-catalytic subunit (PRKAB2), mRNA.                                  | 1.5341             | Increase          | 0.00056063             |
| 8042207      | NM_152516       | RefSeq      | COMMD1      | Homo sapiens copper metabolism (Murr1) domain containing 1 (COMMD1), mRNA.                                                | 1.5335             | Increase          | 0.001713385            |
| 8172471      | NM_006875       | RefSeq      | PIM2        | Homo sapiens pim-2 oncogene (PIM2), mRNA.                                                                                 | 1.5325             | Increase          | 0.000445886            |
| 8133032      | ---             | ---         | ---         | ---                                                                                                                       | 1.5293             | Increase          | 0.00267027             |
| 8021584      | NM_002639       | RefSeq      | SERPINB5    | Homo sapiens serpin peptidase inhibitor, clade B (ovalbumin), member 5 (SERPINB5), mRNA.                                  | 1.5287             | Increase          | 0.007943386            |

| Probe Set ID | mRNA Accession  | mRNA Source | Gene Symbol    | mRNA Description                                                                                                                             | Linear fold change | Increase/Decrease | p-value (non adjusted) |
|--------------|-----------------|-------------|----------------|----------------------------------------------------------------------------------------------------------------------------------------------|--------------------|-------------------|------------------------|
| 8172905      | NM_004493       | RefSeq      | HSD17B10       | Homo sapiens hydroxysteroid (17-beta) dehydrogenase 10 (HSD17B10), nuclear gene encoding mitochondrial protein, transcript variant 1, mRNA   | 1.5266             | Increase          | 0,006480694            |
| 7977507      | NR_002312       | RefSeq      | RPPH1          | Homo sapiens ribonuclease P RNA component H1 (RPPH1), RNase P RNA.                                                                           | 1.5250             | Increase          | 0,00786226             |
| 7899484      | ENST00000459072 | ENSEMBL     | ---            | ncrna:snoRNA chromosome:GRCh37:1:28843988:28844087:1 gene:ENSG00000238821                                                                    | 1.5245             | Increase          | 0,009321009            |
| 7905127      | ENST00000410896 | ENSEMBL     | ---            | ncrna:misc_RNA chromosome:GRCh37:1:150183930:150184221:1 gene:ENSG00000222828                                                                | 1.5241             | Increase          | 0,000605193            |
| 8123463      | NM_018288       | RefSeq      | PHF10          | Homo sapiens PHD finger protein 10 (PHF10), transcript variant 1, mRNA.                                                                      | 1.5239             | Increase          | 7,37E-05               |
| 8116980      | NM_001165032    | RefSeq      | RNF182         | Homo sapiens ring finger protein 182 (RNF182), transcript variant 1, mRNA.                                                                   | 1.5213             | Increase          | 0,000123658            |
| 7956088      | NM_002868       | RefSeq      | RAB5B          | Homo sapiens RAB5B, member RAS oncogene family (RAB5B), mRNA.                                                                                | 1.5208             | Increase          | 0,000528511            |
| 8155487      | NR_003674       | RefSeq      | KGFLP1         | Homo sapiens keratinocyte growth factor-like protein 1 (KGFLP1), non-coding RNA.                                                             | 1.5204             | Increase          | 0,000402425            |
| 8161423      | NR_003674       | RefSeq      | KGFLP1         | Homo sapiens keratinocyte growth factor-like protein 1 (KGFLP1), non-coding RNA.                                                             | 1.5204             | Increase          | 0,000402425            |
| 8161455      | NR_003674       | RefSeq      | KGFLP1         | Homo sapiens keratinocyte growth factor-like protein 1 (KGFLP1), non-coding RNA.                                                             | 1.5204             | Increase          | 0,000402425            |
| 8005547      | NR_006880       | RefSeq      | SNORD3A        | Homo sapiens small nucleolar RNA, C/D box 3A (SNORD3A), small nucleolar RNA.                                                                 | 1.5182             | Increase          | 0,009652832            |
| 8005553      | NR_006880       | RefSeq      | SNORD3A        | Homo sapiens small nucleolar RNA, C/D box 3A (SNORD3A), small nucleolar RNA.                                                                 | 1.5182             | Increase          | 0,009652832            |
| 8013323      | NR_006880       | RefSeq      | SNORD3A        | Homo sapiens small nucleolar RNA, C/D box 3A (SNORD3A), small nucleolar RNA.                                                                 | 1.5182             | Increase          | 0,009652832            |
| 8013325      | NR_006880       | RefSeq      | SNORD3A        | Homo sapiens small nucleolar RNA, C/D box 3A (SNORD3A), small nucleolar RNA.                                                                 | 1.5182             | Increase          | 0,009652832            |
| 8013329      | NR_006880       | RefSeq      | SNORD3A        | Homo sapiens small nucleolar RNA, C/D box 3A (SNORD3A), small nucleolar RNA.                                                                 | 1.5182             | Increase          | 0,009652832            |
| 7908917      | NM_006763       | RefSeq      | BTG2           | Homo sapiens BTG family, member 2 (BTG2), mRNA.                                                                                              | 1.5140             | Increase          | 0,000290523            |
| 8149250      | NM_001080826    | RefSeq      | SGK223         | Homo sapiens homolog of rat pragma of Rnd2 (SGK223), mRNA.                                                                                   | 1.5138             | Increase          | 6,56E-05               |
| 7997962      | NM_004413       | RefSeq      | DPEP1          | Homo sapiens dipeptidase 1 (renal) (DPEP1), transcript variant 1, mRNA.                                                                      | 1.5134             | Increase          | 0,00132352             |
| 8154848      | NM_007343       | RefSeq      | PRSS3          | Homo sapiens protease, serine, 3 (PRSS3), transcript variant 1, mRNA.                                                                        | 1.5130             | Increase          | 0,002542692            |
| 8105852      | NM_033281       | RefSeq      | MRPS36         | Homo sapiens mitochondrial ribosomal protein S36 (MRPS36), nuclear gene encoding mitochondrial protein, mRNA.                                | 1.5120             | Increase          | 0,00031273             |
| 8058203      | NM_139163       | RefSeq      | ALS2CR12       | Homo sapiens amyotrophic lateral sclerosis 2 (juvenile) chromosome region, candidate 12 (ALS2CR12), transcript variant 1, mRNA.              | 1.5111             | Increase          | 0,007752665            |
| 8172204      | NM_000898       | RefSeq      | MAOB           | Homo sapiens monoamine oxidase B (MAOB), nuclear gene encoding mitochondrial protein, mRNA.                                                  | 1.5093             | Increase          | 0,000151155            |
| 7958414      | NM_014301       | RefSeq      | ISCU           | Homo sapiens iron-sulfur cluster scaffold homolog (E. coli) (ISCU), nuclear gene encoding mitochondrial protein, transcript variant 1, mRNA. | 1.5087             | Increase          | 0,00069786             |
| 8098195      | NM_006745       | RefSeq      | SC4MOL         | Homo sapiens sterol-C4-methyl oxidase-like (SC4MOL), transcript variant 1, mRNA.                                                             | 1.5079             | Increase          | 0,004693109            |
| 8131666      | NM_002214       | RefSeq      | ITGB8          | Homo sapiens integrin, beta 8 (ITGB8), mRNA.                                                                                                 | 1.5032             | Increase          | 0,00036405             |
| 8152133      | NM_015713       | RefSeq      | RRM2B          | Homo sapiens ribonucleotide reductase M2 B (TP53 inducible) (RRM2B), transcript variant 1, mRNA.                                             | 1.5017             | Increase          | 0,000293313            |
| 7915659      | NM_024602       | RefSeq      | HECTD3         | Homo sapiens HECT domain containing 3 (HECTD3), mRNA.                                                                                        | 1.5017             | Increase          | 0,000119417            |
| 7951224      | NM_004771       | RefSeq      | MMP20          | Homo sapiens matrix metalloproteinase 20 (MMP20), mRNA.                                                                                      | 1.5014             | Increase          | 0,000503339            |
| 8107857      | ENST00000362585 | ENSEMBL     | ---            | ncrna:rRNA chromosome:GRCh37:5:129450105:129450194:1 gene:ENSG00000199455                                                                    | 1.5007             | Increase          | 0,001235363            |
| 7929065      | NM_001548       | RefSeq      | IFIT1          | Homo sapiens interferon-induced protein with tetratricopeptide repeats 1 (IFIT1), transcript variant 2, mRNA.                                | 5,2727             | Decrease          | 2,86E-07               |
| 7914127      | NM_002038       | RefSeq      | IFI6           | Homo sapiens interferon, alpha-inducible protein 6 (IFI6), transcript variant 1, mRNA.                                                       | 3,1346             | Decrease          | 8,27E-07               |
| 8140967      | NM_017654       | RefSeq      | SAMD9          | Homo sapiens sterile alpha motif domain containing 9 (SAMD9), mRNA.                                                                          | 2,8635             | Decrease          | 0,000126569            |
| 8104788      | NM_001145525    | RefSeq      | RAI14          | Homo sapiens retinoic acid induced 14 (RAI14), transcript variant 6, mRNA.                                                                   | 2,7577             | Decrease          | 3,69E-05               |
| 7937335      | NM_003641       | RefSeq      | IFITM1         | Homo sapiens interferon induced transmembrane protein 1 (9-27) (IFITM1), mRNA.                                                               | 2,6744             | Decrease          | 6,34E-05               |
| 7929047      | NM_001547       | RefSeq      | IFIT2          | Homo sapiens interferon-induced protein with tetratricopeptide repeats 2 (IFIT2), mRNA.                                                      | 2,6123             | Decrease          | 2,42E-06               |
| 8176815      | ENST00000414998 | ENSEMBL     | ---            | cdna:known chromosome:GRCh37:Y:24083193:24083297:-1 gene:ENSG00000225001                                                                     | 2,5755             | Decrease          | 0,001035365            |
| 8176941      | ENST00000414998 | ENSEMBL     | ---            | cdna:known chromosome:GRCh37:Y:24083193:24083297:-1 gene:ENSG00000225001                                                                     | 2,5755             | Decrease          | 0,001035365            |
| 8177393      | ENST00000414998 | ENSEMBL     | ---            | cdna:known chromosome:GRCh37:Y:24083193:24083297:-1 gene:ENSG00000225001                                                                     | 2,5755             | Decrease          | 0,001035365            |
| 8082075      | NM_138287       | RefSeq      | DTX3L          | Homo sapiens deltex 3-like (Drosophila) (DTX3L), mRNA.                                                                                       | 2,5479             | Decrease          | 5,98E-06               |
| 7929052      | NM_001031683    | RefSeq      | IFIT3          | Homo sapiens interferon-induced protein with tetratricopeptide repeats 3 (IFIT3), transcript variant 2, mRNA.                                | 2,5103             | Decrease          | 3,51E-05               |
| 8101126      | NM_001565       | RefSeq      | CXCL10         | Homo sapiens chemokine (C-X-C motif) ligand 10 (CXCL10), mRNA.                                                                               | 2,4752             | Decrease          | 0,000813758            |
| 8134339      | NM_001040152    | RefSeq      | PEG10          | Homo sapiens paternally expressed 10 (PEG10), transcript variant 1, mRNA.                                                                    | 2,3669             | Decrease          | 6,02E-05               |
| 7938364      | BX641032        | GenBank     | WEE1           | Homo sapiens mRNA; cDNA DKFZp686I18166 (from clone DKFZp686I18166).                                                                          | 2,3633             | Decrease          | 5,80E-05               |
| 8056285      | NM_022168       | RefSeq      | IFIH1          | Homo sapiens interferon induced with helicase C domain 1 (IFIH1), mRNA.                                                                      | 2,3220             | Decrease          | 6,56E-06               |
| 8090018      | NM_031458       | RefSeq      | PARP9          | Homo sapiens poly (ADP-ribose) polymerase family, member 9 (PARP9), transcript variant 1, mRNA.                                              | 2,3114             | Decrease          | 1,71E-06               |
| 8046086      | NM_203463       | RefSeq      | LASS6          | Homo sapiens LAG1 homolog, ceramide synthase 6 (LASS6), mRNA.                                                                                | 2,3056             | Decrease          | 1,12E-06               |
| 7902553      | NM_006417       | RefSeq      | IFI44          | Homo sapiens interferon-induced protein 44 (IFI44), mRNA.                                                                                    | 2,3009             | Decrease          | 0,000169696            |
| 8108301      | NM_005733       | RefSeq      | KIF20A         | Homo sapiens kinesin family member 20A (KIF20A), mRNA.                                                                                       | 2,2903             | Decrease          | 2,04E-05               |
| 7981290      | NM_004184       | RefSeq      | WARS           | Homo sapiens tryptophanyl-tRNA synthetase (WARS), transcript variant 1, mRNA.                                                                | 2,2895             | Decrease          | 1,36E-06               |
| 8109639      | NM_004219       | RefSeq      | PTTG1 // PTTG1 | Homo sapiens pituitary tumor-transforming 1 (PTTG1), mRNA.                                                                                   | 2,2741             | Decrease          | 0,000113367            |
| 8138689      | NM_003930       | RefSeq      | SKAP2          | Homo sapiens src kinase associated phosphoprotein 2 (SKAP2), mRNA.                                                                           | 2,2696             | Decrease          | 5,03E-06               |
| 7938366      | BX641032        | GenBank     | WEE1           | Homo sapiens mRNA; cDNA DKFZp686I18166 (from clone DKFZp686I18166).                                                                          | 2,2222             | Decrease          | 0,000121379            |
| 8102848      | NM_030648       | RefSeq      | SETD7          | Homo sapiens SET domain containing (lysine methyltransferase) 7 (SETD7), mRNA.                                                               | 2,2172             | Decrease          | 1,08E-06               |
| 8083876      | NM_005414       | RefSeq      | SKIL           | Homo sapiens SKI-like oncogene (SKIL), transcript variant 1, mRNA.                                                                           | 2,1842             | Decrease          | 2,71E-05               |
| 8136248      | NM_002402       | RefSeq      | MEST           | Homo sapiens mesoderm specific transcript homolog (mouse) (MEST), transcript variant 1, mRNA.                                                | 2,1797             | Decrease          | 4,75E-06               |
| 8160559      | NM_014314       | RefSeq      | DDX58          | Homo sapiens DEAD (Asp-Glu-Ala-Asp) box polypeptide 58 (DDX58), mRNA.                                                                        | 2,1600             | Decrease          | 0,000223762            |
| 7935403      | NM_032900       | RefSeq      | ARHGAP19       | Homo sapiens Rho GTPase activating protein 19 (ARHGAP19), mRNA.                                                                              | 2,1553             | Decrease          | 3,76E-06               |
| 8091327      | NM_021105       | RefSeq      | PLSCR1         | Homo sapiens phospholipid scramblase 1 (PLSCR1), mRNA.                                                                                       | 2,1417             | Decrease          | 3,70E-06               |
| 7922051      | NM_003851       | RefSeq      | CREG1          | Homo sapiens cellular repressor of E1A-stimulated genes 1 (CREG1), mRNA.                                                                     | 2,1346             | Decrease          | 4,42E-05               |
| 7902687      | NM_001554       | RefSeq      | CYR61          | Homo sapiens cysteine-rich, angiogenic inducer, 61 (CYR61), mRNA.                                                                            | 2,1242             | Decrease          | 4,33E-06               |
| 8047078      | NM_017694       | RefSeq      | MFSD6          | Homo sapiens major facilitator superfamily domain containing 6 (MFSD6), mRNA.                                                                | 2,1089             | Decrease          | 4,31E-05               |
| 8046861      | NM_002210       | RefSeq      | ITGAV          | Homo sapiens integrin, alpha V (vitronectin receptor, alpha polypeptide, antigen CD51) (ITGAV), transcript variant 1, mRNA.                  | 2,1040             | Decrease          | 1,43E-05               |
| 8080562      | NM_018725       | RefSeq      | IL17RB         | Homo sapiens interleukin 17 receptor B (IL17RB), mRNA.                                                                                       | 2,0857             | Decrease          | 1,04E-05               |
| 8059650      | NM_080424       | RefSeq      | SP110          | Homo sapiens SP110 nuclear body protein (SP110), transcript variant c, mRNA.                                                                 | 2,0809             | Decrease          | 1,14E-05               |
| 8136095      | NM_015328       | RefSeq      | AHCYL2         | Homo sapiens adenosylhomocysteinase-like 2 (AHCYL2), transcript variant 1, mRNA.                                                             | 2,0653             | Decrease          | 1,58E-05               |



| Probe Set ID | mRNA Accession  | mRNA Source | Gene Symbol | mRNA Description                                                                                                                         | Linear fold change | Increase/Decrease | p-value (non adjusted) |
|--------------|-----------------|-------------|-------------|------------------------------------------------------------------------------------------------------------------------------------------|--------------------|-------------------|------------------------|
| 7914807      | ---             | ---         | ---         | ---                                                                                                                                      | 2,0650             | Decrease          | 0,009755973            |
| 8122099      | NM_006208       | RefSeq      | ENPP1       | Homo sapiens ectonucleotide pyrophosphatase/phosphodiesterase 1 (ENPP1), mRNA.                                                           | 2,0630             | Decrease          | 7,33E-05               |
| 7929388      | NM_016341       | RefSeq      | PLCE1       | Homo sapiens phospholipase C, epsilon 1 (PLCE1), transcript variant 1, mRNA.                                                             | 2,0432             | Decrease          | 0,00015589             |
| 7928944      | NM_004670       | RefSeq      | PAPSS2      | Homo sapiens 3'-phosphoadenosine 5'-phosphosulfate synthase 2 (PAPSS2), transcript variant 1, mRNA.                                      | 2,0200             | Decrease          | 6,67E-06               |
| 7949971      | NM_001876       | RefSeq      | CPT1A       | Homo sapiens carnitine palmitoyltransferase 1A (liver) (CPT1A), nuclear gene encoding mitochondrial protein, transcript variant 1, mRNA. | 2,0181             | Decrease          | 4,22E-06               |
| 8096704      | NM_001033047    | RefSeq      | NPNT        | Homo sapiens nephronectin (NPNT), mRNA.                                                                                                  | 2,0059             | Decrease          | 9,93E-05               |
| 7967117      | NM_003733       | RefSeq      | OASL        | Homo sapiens 2'-5'-oligoadenylate synthetase-like (OASL), transcript variant 1, mRNA.                                                    | 1,9868             | Decrease          | 9,10E-06               |
| 7958895      | NM_006187       | RefSeq      | OAS3        | Homo sapiens 2'-5'-oligoadenylate synthetase 3, 100kDa (OAS3), mRNA.                                                                     | 1,9774             | Decrease          | 0,000111529            |
| 7982269      | ENST00000459285 | ENSEMBL     | ---         | ncrna:snoRNA chromosome:GRCh37:15:30677162:30677294:-1 gene:ENSG00000238519                                                              | 1,9727             | Decrease          | 6,38E-06               |
| 7987025      | ENST00000459285 | ENSEMBL     | ---         | ncrna:snoRNA chromosome:GRCh37:15:30677162:30677294:-1 gene:ENSG00000238519                                                              | 1,9727             | Decrease          | 6,38E-06               |
| 8156982      | NM_001042551    | RefSeq      | SMC2        | Homo sapiens structural maintenance of chromosomes 2 (SMC2), transcript variant 2, mRNA.                                                 | 1,9559             | Decrease          | 6,91E-05               |
| 8023497      | NM_005603       | RefSeq      | ATP8B1      | Homo sapiens ATPase, aminophospholipid transporter, class I, type 8B, member 1 (ATP8B1), mRNA.                                           | 1,9532             | Decrease          | 0,000236696            |
| 8096098      | NM_016129       | RefSeq      | COP54       | Homo sapiens COP9 constitutive photomorphogenic homolog subunit 4 (Arabidopsis) (COP54), mRNA.                                           | 1,9502             | Decrease          | 7,46E-06               |
| 8097841      | NM_015271       | RefSeq      | TRIM2       | Homo sapiens tripartite motif-containing 2 (TRIM2), transcript variant 1, mRNA.                                                          | 1,9397             | Decrease          | 9,09E-05               |
| 8168794      | NM_006733       | RefSeq      | CENPI       | Homo sapiens centromere protein I (CENPI), mRNA.                                                                                         | 1,9367             | Decrease          | 6,84E-05               |
| 8122202      | NM_001130173    | RefSeq      | MYB         | Homo sapiens v-myb myeloblastosis viral oncogene homolog (avian) (MYB), transcript variant 1, mRNA.                                      | 1,9335             | Decrease          | 3,05E-05               |
| 8028613      | NM_172140       | RefSeq      | IL29        | Homo sapiens interleukin 29 (interferon, lambda 1) (IL29), mRNA.                                                                         | 1,9298             | Decrease          | 1,54E-05               |
| 8074606      | NM_017414       | RefSeq      | USP18       | Homo sapiens ubiquitin specific peptidase 18 (USP18), mRNA.                                                                              | 1,9262             | Decrease          | 2,21E-05               |
| 7982248      | ENST00000384701 | ENSEMBL     | ---         | ncrna:snoRNA chromosome:GRCh37:15:30404401:30404533:1 gene:ENSG00000207432                                                               | 1,9251             | Decrease          | 5,00E-06               |
| 8092348      | NM_014398       | RefSeq      | LAMP3       | Homo sapiens lysosomal-associated membrane protein 3 (LAMP3), mRNA.                                                                      | 1,9186             | Decrease          | 9,01E-05               |
| 8096808      | NM_017918       | RefSeq      | CCDC109B    | Homo sapiens coiled-coil domain containing 109B (CCDC109B), mRNA.                                                                        | 1,9183             | Decrease          | 5,22E-05               |
| 7939158      | NM_001076786    | RefSeq      | QSER1       | Homo sapiens glutamine and serine rich 1 (QSER1), mRNA.                                                                                  | 1,9157             | Decrease          | 0,001175399            |
| 8045768      | NM_152522       | RefSeq      | ARL6IP6     | Homo sapiens ADP-ribosylation-like factor 6 interacting protein 6 (ARL6IP6), transcript variant 1, mRNA.                                 | 1,9150             | Decrease          | 0,001183803            |
| 7966259      | NM_016433       | RefSeq      | GLTP        | Homo sapiens glycolipid transfer protein (GLTP), mRNA.                                                                                   | 1,9080             | Decrease          | 0,000298715            |
| 8051501      | NM_002759       | RefSeq      | EIF2AK2     | Homo sapiens eukaryotic translation initiation factor 2-alpha kinase 2 (EIF2AK2), transcript variant 1, mRNA.                            | 1,9051             | Decrease          | 2,61E-05               |
| 8169969      | NM_032458       | RefSeq      | PHF6        | Homo sapiens PHD finger protein 6 (PHF6), transcript variant 2, mRNA.                                                                    | 1,9036             | Decrease          | 0,000154434            |
| 7980744      | NM_004755       | RefSeq      | RPS6KA5     | Homo sapiens ribosomal protein S6 kinase, 90kDa, polypeptide 5 (RPS6KA5), transcript variant 1, mRNA.                                    | 1,8923             | Decrease          | 0,0001567              |
| 8178193      | NM_019111       | RefSeq      | HLA-DRA     | Homo sapiens major histocompatibility complex, class II, DR alpha (HLA-DRA), mRNA.                                                       | 1,8829             | Decrease          | 0,000332934            |
| 7973618      | NM_006084       | RefSeq      | IRF9        | Homo sapiens interferon regulatory factor 9 (IRF9), mRNA.                                                                                | 1,8811             | Decrease          | 1,01E-05               |
| 8056408      | NM_004482       | RefSeq      | GALNT3      | Homo sapiens UDP-N-acetyl-alpha-D-galactosamine:polypeptide N-acetylgalactosaminyltransferase 3 (GalNAc-T3) (GALNT3), mRNA.              | 1,8801             | Decrease          | 4,35E-05               |
| 8085689      | NM_014744       | RefSeq      | TBC1D5      | Homo sapiens TBC1 domain family, member 5 (TBC1D5), transcript variant 2, mRNA.                                                          | 1,8748             | Decrease          | 0,004546357            |
| 8057744      | NM_007315       | RefSeq      | STAT1       | Homo sapiens signal transducer and activator of transcription 1, 91kDa (STAT1), transcript variant alpha, mRNA.                          | 1,8719             | Decrease          | 1,50E-05               |
| 8114185      | NM_080656       | RefSeq      | CDKN2AIPNL  | Homo sapiens CDKN2A interacting protein N-terminal like (CDKN2AIPNL), mRNA.                                                              | 1,8715             | Decrease          | 0,001795286            |
| 8141035      | NM_001099401    | RefSeq      | SGCE        | Homo sapiens sarcoglycan, epsilon (SGCE), transcript variant 1, mRNA.                                                                    | 1,8700             | Decrease          | 6,75E-05               |
| 8113050      | NM_004365       | RefSeq      | CETN3       | Homo sapiens centrin, EF-hand protein, 3 (CDC31 homolog, yeast) (CETN3), mRNA.                                                           | 1,8687             | Decrease          | 0,005703372            |
| 8043349      | NM_022662       | RefSeq      | ANAPC1      | Homo sapiens anaphase promoting complex subunit 1 (ANAPC1), mRNA.                                                                        | 1,8685             | Decrease          | 3,91E-05               |
| 7975779      | NM_005252       | RefSeq      | FOS         | Homo sapiens FBJ murine osteosarcoma viral oncogene homolog (FOS), mRNA.                                                                 | 1,8647             | Decrease          | 1,84E-05               |
| 8056222      | NM_001935       | RefSeq      | DPP4        | Homo sapiens dipeptidyl-peptidase 4 (DPP4), mRNA.                                                                                        | 1,8587             | Decrease          | 6,24E-05               |
| 8106986      | NM_014899       | RefSeq      | RHOBTB3     | Homo sapiens Rho-related BTB domain containing 3 (RHOBTB3), mRNA.                                                                        | 1,8573             | Decrease          | 1,44E-05               |
| 8150103      | NM_002095       | RefSeq      | GTF2E2      | Homo sapiens general transcription factor IIE, polypeptide 2, beta 34kDa (GTF2E2), mRNA.                                                 | 1,8515             | Decrease          | 7,31E-05               |
| 8175217      | NM_001448       | RefSeq      | GPC4        | Homo sapiens glypican 4 (GPC4), mRNA.                                                                                                    | 1,8503             | Decrease          | 3,56E-05               |
| 7950641      | NM_023930       | RefSeq      | KCTD14      | Homo sapiens potassium channel tetramerisation domain containing 14 (KCTD14), mRNA.                                                      | 1,8443             | Decrease          | 1,46E-05               |
| 8147373      | BC071775        | GenBank     | ---         | Homo sapiens cDNA clone MGC:88417 IMAGE:4594483, complete cds.                                                                           | 1,8421             | Decrease          | 0,002547173            |
| 7976146      | ENST00000384612 | ENSEMBL     | ---         | ncrna:misc_RNA chromosome:GRCh37:14:89306509:89306607:1 gene:ENSG00000207342                                                             | 1,8408             | Decrease          | 0,00646666             |
| 8008885      | NR_029493       | RefSeq      | MIR21       | Homo sapiens microRNA 21 (MIR21), microRNA.                                                                                              | 1,8378             | Decrease          | 7,82E-05               |
| 8046003      | NM_012198       | RefSeq      | GCA         | Homo sapiens grancalcin, EF-hand calcium binding protein (GCA), mRNA.                                                                    | 1,8359             | Decrease          | 0,000106949            |
| 8034772      | NM_018154       | RefSeq      | ASF1B       | Homo sapiens ASF1 anti-silencing function 1 homolog B (S. cerevisiae) (ASF1B), mRNA.                                                     | 1,8337             | Decrease          | 1,31E-05               |
| 8109194      | NM_000112       | RefSeq      | SLC26A2     | Homo sapiens solute carrier family 26 (sulfate transporter), member 2 (SLC26A2), mRNA.                                                   | 1,8299             | Decrease          | 0,000569595            |
| 8151496      | NM_001033723    | RefSeq      | ZNF704      | Homo sapiens zinc finger protein 704 (ZNF704), mRNA.                                                                                     | 1,8286             | Decrease          | 0,000120725            |
| 8147079      | NM_033402       | RefSeq      | LRRCC1      | Homo sapiens leucine rich repeat and coiled-coil domain containing 1 (LRRCC1), mRNA.                                                     | 1,8251             | Decrease          | 0,000288168            |
| 7943297      | NM_014679       | RefSeq      | CEP57       | Homo sapiens centrosomal protein 57kDa (CEP57), mRNA.                                                                                    | 1,8246             | Decrease          | 0,001027552            |
| 8121588      | NM_013352       | RefSeq      | DSE         | Homo sapiens dermatan sulfate epimerase (DSE), transcript variant 1, mRNA.                                                               | 1,8241             | Decrease          | 1,38E-05               |
| 8083282      | NM_032383       | RefSeq      | HPS3        | Homo sapiens Hermansky-Pudlak syndrome 3 (HPS3), mRNA.                                                                                   | 1,8169             | Decrease          | 0,000135249            |
| 7993664      | NM_014711       | RefSeq      | CP110       | Homo sapiens CP110 protein (CP110), mRNA.                                                                                                | 1,8148             | Decrease          | 0,000430761            |
| 7918323      | NM_002959       | RefSeq      | SORT1       | Homo sapiens sortilin 1 (SORT1), mRNA.                                                                                                   | 1,8145             | Decrease          | 0,000166269            |
| 8005894      | NM_017784       | RefSeq      | OSBPL10     | Homo sapiens oxysterol binding protein-like 10 (OSBPL10), transcript variant 1, mRNA.                                                    | 1,8140             | Decrease          | 1,66E-05               |
| 7928046      | NM_012339       | RefSeq      | TSPAN15     | Homo sapiens tetraspanin 15 (TSPAN15), mRNA.                                                                                             | 1,8104             | Decrease          | 3,89E-05               |
| 8169624      | NM_145305       | RefSeq      | SLC25A43    | Homo sapiens solute carrier family 25, member 43 (SLC25A43), nuclear gene encoding mitochondrial protein, mRNA.                          | 1,8059             | Decrease          | 8,00E-05               |
| 8010454      | NM_020914       | RefSeq      | RNF213      | Homo sapiens ring finger protein 213 (RNF213), transcript variant 1, mRNA.                                                               | 1,8051             | Decrease          | 0,002455952            |
| 8020090      | NM_020648       | RefSeq      | TWSG1       | Homo sapiens twisted gastrulation homolog 1 (Drosophila) (TWSG1), mRNA.                                                                  | 1,7998             | Decrease          | 3,70E-05               |
| 8098423      | NM_018248       | RefSeq      | NEIL3       | Homo sapiens nei endonuclease VIII-like 3 (E. coli) (NEIL3), mRNA.                                                                       | 1,7945             | Decrease          | 1,60E-05               |
| 8014316      | NM_002985       | RefSeq      | CCL5        | Homo sapiens chemokine (C-C motif) ligand 5 (CCL5), mRNA.                                                                                | 1,7906             | Decrease          | 0,000294976            |
| 7957177      | NM_014999       | RefSeq      | RAB21       | Homo sapiens RAB21, member RAS oncogene family (RAB21), mRNA.                                                                            | 1,7896             | Decrease          | 0,000215352            |
| 8054437      | NM_022662       | RefSeq      | ANAPC1      | Homo sapiens anaphase promoting complex subunit 1 (ANAPC1), mRNA.                                                                        | 1,7863             | Decrease          | 0,004581769            |
| 7966878      | NM_007174       | RefSeq      | CIT         | Homo sapiens citron (rho-interacting, serine/threonine kinase 21) (CIT), mRNA.                                                           | 1,7858             | Decrease          | 0,00059721             |

| Probe Set ID | mRNA Accession  | mRNA Source | Gene Symbol | mRNA Description                                                                                                                         | Linear fold change | Increase/Decrease | p-value (non adjusted) |
|--------------|-----------------|-------------|-------------|------------------------------------------------------------------------------------------------------------------------------------------|--------------------|-------------------|------------------------|
| 8096361      | NM_016323       | RefSeq      | HERC5       | Homo sapiens hect domain and RLD 5 (HERC5), mRNA.                                                                                        | 1,7775             | Decrease          | 0,000110338            |
| 8143684      | NM_004911       | RefSeq      | PDIA4       | Homo sapiens protein disulfide isomerase family A, member 4 (PDIA4), mRNA.                                                               | 1,7757             | Decrease          | 6,70E-06               |
| 7951004      | NM_020179       | RefSeq      | C11orf75    | Homo sapiens chromosome 11 open reading frame 75 (C11orf75), mRNA.                                                                       | 1,7726             | Decrease          | 0,000345166            |
| 8102076      | NM_001813       | RefSeq      | CENPE       | Homo sapiens centromere protein E, 312kDa (CENPE), mRNA.                                                                                 | 1,7588             | Decrease          | 0,008137304            |
| 7991406      | NM_003981       | RefSeq      | PRC1        | Homo sapiens protein regulator of cytokinesis 1 (PRC1), transcript variant 1, mRNA.                                                      | 1,7585             | Decrease          | 1,86E-05               |
| 8047288      | NM_152524       | RefSeq      | SGOL2       | Homo sapiens shugoshin-like 2 (S. pombe) (SGOL2), transcript variant 1, mRNA.                                                            | 1,7565             | Decrease          | 0,000271177            |
| 8006542      | NM_001030006    | RefSeq      | AP2B1       | Homo sapiens adaptor-related protein complex 2, beta 1 subunit (AP2B1), transcript variant 1, mRNA.                                      | 1,7563             | Decrease          | 0,000255619            |
| 8176174      | NM_002436       | RefSeq      | MPP1        | Homo sapiens membrane protein, palmitoylated 1, 55kDa (MPP1), transcript variant 1, mRNA.                                                | 1,7561             | Decrease          | 3,72E-05               |
| 8043322      | NM_022662       | RefSeq      | ANAPC1      | Homo sapiens anaphase promoting complex subunit 1 (ANAPC1), mRNA.                                                                        | 1,7555             | Decrease          | 0,007406308            |
| 7984540      | NM_138555       | RefSeq      | KIF23       | Homo sapiens kinesin family member 23 (KIF23), transcript variant 1, mRNA.                                                               | 1,7532             | Decrease          | 1,45E-05               |
| 8083166      | NM_003304       | RefSeq      | TRPC1       | Homo sapiens transient receptor potential cation channel, subfamily C, member 1 (TRPC1), mRNA.                                           | 1,7529             | Decrease          | 7,65E-05               |
| 7980742      | ENST00000433659 | ENSEMBL     | LOC283588   | cDNA FLJ37957 fis, clone CTONG2009529 gene:ENSG00000236368                                                                               | 1,7439             | Decrease          | 0,000260407            |
| 7929438      | NM_018063       | RefSeq      | HELLS       | Homo sapiens helicase, lymphoid-specific (HELLS), mRNA.                                                                                  | 1,7402             | Decrease          | 0,001620691            |
| 8016590      | NM_030802       | RefSeq      | FAM117A     | Homo sapiens family with sequence similarity 117, member A (FAM117A), mRNA.                                                              | 1,7364             | Decrease          | 3,93E-05               |
| 7901765      | NM_015888       | RefSeq      | HOOK1       | Homo sapiens hook homolog 1 (Drosophila) (HOOK1), mRNA.                                                                                  | 1,7359             | Decrease          | 0,000794157            |
| 7947110      | NM_024680       | RefSeq      | E2F8        | Homo sapiens E2F transcription factor 8 (E2F8), mRNA.                                                                                    | 1,7329             | Decrease          | 8,99E-05               |
| 8089299      | NM_001777       | RefSeq      | CD47        | Homo sapiens CD47 molecule (CD47), transcript variant 1, mRNA.                                                                           | 1,7327             | Decrease          | 0,000536191            |
| 7984922      | NM_002435       | RefSeq      | MPI         | Homo sapiens mannose phosphate isomerase (MPI), mRNA.                                                                                    | 1,7309             | Decrease          | 3,78E-05               |
| 8145570      | NM_001017420    | RefSeq      | ESCO2       | Homo sapiens establishment of cohesion 1 homolog 2 (S. cerevisiae) (ESCO2), mRNA.                                                        | 1,7307             | Decrease          | 0,000143585            |
| 8166784      | NM_004615       | RefSeq      | TSPAN7      | Homo sapiens tetraspanin 7 (TSPAN7), mRNA.                                                                                               | 1,7304             | Decrease          | 0,000251956            |
| 8085477      | NM_003709       | RefSeq      | KLF7        | Homo sapiens Kruppel-like factor 7 (ubiquitous) (KLF7), mRNA.                                                                            | 1,7298             | Decrease          | 0,000527741            |
| 8031145      | NM_024075       | RefSeq      | TSEN34      | Homo sapiens tRNA splicing endonuclease 34 homolog (S. cerevisiae) (TSEN34), transcript variant 1, mRNA.                                 | 1,7297             | Decrease          | 0,000742391            |
| 7927915      | NM_152709       | RefSeq      | STOX1       | Homo sapiens storkhead box 1 (STOX1), transcript variant 1, mRNA.                                                                        | 1,7271             | Decrease          | 0,000440098            |
| 8108330      | NM_016604       | RefSeq      | KDM3B       | Homo sapiens lysine (K)-specific demethylase 3B (KDM3B), mRNA.                                                                           | 1,7270             | Decrease          | 0,000158141            |
| 8072170      | NM_032045       | RefSeq      | KREMEN1     | Homo sapiens kingle containing transmembrane protein 1 (KREMEN1), transcript variant 2, mRNA.                                            | 1,7249             | Decrease          | 9,98E-05               |
| 7982290      | ---             | ---         | ---         | ---                                                                                                                                      | 1,7244             | Decrease          | 0,001769406            |
| 8083310      | NM_007282       | RefSeq      | RNF13       | Homo sapiens ring finger protein 13 (RNF13), transcript variant 1, mRNA.                                                                 | 1,7198             | Decrease          | 1,99E-05               |
| 8046488      | NM_031942       | RefSeq      | CDCA7       | Homo sapiens cell division cycle associated 7 (CDCA7), transcript variant 1, mRNA.                                                       | 1,7166             | Decrease          | 2,60E-05               |
| 7999909      | NM_016235       | RefSeq      | GPRC5B      | Homo sapiens G protein-coupled receptor, family C, group 5, member B (GPRC5B), mRNA.                                                     | 1,7129             | Decrease          | 1,84E-05               |
| 8145977      | NM_021623       | RefSeq      | PLEKHA2     | Homo sapiens pleckstrin homology domain containing, family A (phosphoinositide binding specific) member 2 (PLEKHA2), mRNA.               | 1,7121             | Decrease          | 4,52E-05               |
| 8073548      | NM_019106       | RefSeq      | 09/03       | Homo sapiens septin 3 (SEPT3), transcript variant B, mRNA.                                                                               | 1,7120             | Decrease          | 0,00067481             |
| 8130087      | NM_139126       | RefSeq      | PPIL4       | Homo sapiens peptidylprolyl isomerase (cyclophilin)-like 4 (PPIL4), mRNA.                                                                | 1,7118             | Decrease          | 0,000846908            |
| 8008825      | NM_024612       | RefSeq      | DHX40       | Homo sapiens DEAH (Asp-Glu-Ala-His) box polypeptide 40 (DHX40), transcript variant 1, mRNA.                                              | 1,7106             | Decrease          | 5,34E-05               |
| 8084064      | NM_006636       | RefSeq      | MTHFD2      | Homo sapiens methylenetetrahydrofolate dehydrogenase (NADP+ dependent) 2, methylenetetrahydrofolate cyclohydrolase (MTHFD2), nuclear     | 1,7097             | Decrease          | 2,43E-05               |
| 8109697      | NM_004060       | RefSeq      | CCNG1       | Homo sapiens cyclin G1 (CCNG1), transcript variant 1, mRNA.                                                                              | 1,7072             | Decrease          | 0,000339247            |
| 8017262      | NM_032043       | RefSeq      | BRIP1       | Homo sapiens BRCA1 interacting protein C-terminal helicase 1 (BRIP1), mRNA.                                                              | 1,7049             | Decrease          | 0,000177559            |
| 7929072      | NM_012420       | RefSeq      | IFIT5       | Homo sapiens interferon-induced protein with tetratricopeptide repeats 5 (IFIT5), mRNA.                                                  | 1,7023             | Decrease          | 0,000347354            |
| 8133721      | NM_001540       | RefSeq      | HSPB1       | Homo sapiens heat shock 27kDa protein 1 (HSPB1), mRNA.                                                                                   | 1,7007             | Decrease          | 0,000478724            |
| 8042830      | NR_027405       | RefSeq      | MTHFD2      | Homo sapiens methylenetetrahydrofolate dehydrogenase (NADP+ dependent) 2, methylenetetrahydrofolate cyclohydrolase (MTHFD2), transcript  | 1,6998             | Decrease          | 4,28E-05               |
| 7958884      | NM_016816       | RefSeq      | OAS1        | Homo sapiens 2',5'-oligoadenylate synthetase 1, 40/46kDa (OAS1), transcript variant 1, mRNA.                                             | 1,6986             | Decrease          | 0,000292431            |
| 7979281      | NM_007086       | RefSeq      | WDHD1       | Homo sapiens WD repeat and HMG-box DNA binding protein 1 (WDHD1), transcript variant 1, mRNA.                                            | 1,6979             | Decrease          | 0,000158763            |
| 7903565      | NM_013296       | RefSeq      | GPSM2       | Homo sapiens G-protein signaling modulator 2 (AGS3-like, C. elegans) (GPSM2), mRNA.                                                      | 1,6966             | Decrease          | 6,69E-05               |
| 8151423      | NM_020647       | RefSeq      | JPH1        | Homo sapiens junctophilin 1 (JPH1), mRNA.                                                                                                | 1,6950             | Decrease          | 0,000267385            |
| 7923798      | NM_022731       | RefSeq      | NUCKS1      | Homo sapiens nuclear casein kinase and cyclin-dependent kinase substrate 1 (NUCKS1), mRNA.                                               | 1,6928             | Decrease          | 8,90E-05               |
| 7949765      | NM_001008709    | RefSeq      | PPP1CA      | Homo sapiens protein phosphatase 1, catalytic subunit, alpha isozyme (PPP1CA), transcript variant 3, mRNA.                               | 1,6919             | Decrease          | 3,82E-05               |
| 7927710      | NM_001786       | RefSeq      | CDK1        | Homo sapiens cyclin-dependent kinase 1 (CDK1), transcript variant 1, mRNA.                                                               | 1,6896             | Decrease          | 0,0003631              |
| 8018761      | NM_006456       | RefSeq      | ST6GALNAC2  | Homo sapiens ST6 (alpha-N-acetyl-neuraminyl-2,3-beta-galactosyl-1, 3)-N-acetylgalactosaminide alpha-2,6-sialyltransferase 2 (ST6GALNAC2) | 1,6890             | Decrease          | 0,000173793            |
| 8180372      | NM_006456.1     | ---         | ---         | Homo sapiens ST6 (alpha-N-acetyl-neuraminyl-2,3-beta-galactosyl-1, 3)-N-acetylgalactosaminide alpha-2,6-sialyltransferase 2 (ST6GALNAC2) | 1,6890             | Decrease          | 0,000173793            |
| 7937020      | NM_002417       | RefSeq      | MKI67       | Homo sapiens antigen identified by monoclonal antibody Ki-67 (MKI67), transcript variant 1, mRNA.                                        | 1,6877             | Decrease          | 0,002990025            |
| 7902913      | NM_003503       | RefSeq      | CDC7        | Homo sapiens cell division cycle 7 homolog (S. cerevisiae) (CDC7), transcript variant 1, mRNA.                                           | 1,6834             | Decrease          | 0,000324094            |
| 8097857      | NM_032117       | RefSeq      | MND1        | Homo sapiens meiotic nuclear divisions 1 homolog (S. cerevisiae) (MND1), mRNA.                                                           | 1,6833             | Decrease          | 0,00099557             |
| 8096301      | NM_001040058    | RefSeq      | SPP1        | Homo sapiens secreted phosphoprotein 1 (SPP1), transcript variant 1, mRNA.                                                               | 1,6823             | Decrease          | 6,13E-05               |
| 8082504      | NM_001006109    | RefSeq      | C3orf37     | Homo sapiens chromosome 3 open reading frame 37 (C3orf37), transcript variant 1, mRNA.                                                   | 1,6823             | Decrease          | 2,53E-05               |
| 8151747      | NM_001008495    | RefSeq      | TMEM64      | Homo sapiens transmembrane protein 64 (TMEM64), transcript variant 1, mRNA.                                                              | 1,6823             | Decrease          | 0,000116538            |
| 8155192      | NM_022343       | RefSeq      | GLIPR2      | Homo sapiens GLI pathogenesis-related 2 (GLIPR2), mRNA.                                                                                  | 1,6790             | Decrease          | 0,000136647            |
| 8147697      | NM_024915       | RefSeq      | GRHL2       | Homo sapiens grainyhead-like 2 (Drosophila) (GRHL2), mRNA.                                                                               | 1,6783             | Decrease          | 0,001124207            |
| 7944978      | NM_004879       | RefSeq      | EI24        | Homo sapiens etoposide induced 2,4 mRNA (EI24), transcript variant 1, mRNA.                                                              | 1,6752             | Decrease          | 3,63E-05               |
| 7966135      | NM_014325       | RefSeq      | CORO1C      | Homo sapiens coronin, actin binding protein, 1C (CORO1C), transcript variant 1, mRNA.                                                    | 1,6743             | Decrease          | 7,17E-05               |
| 7922976      | NM_000963       | RefSeq      | PTGS2       | Homo sapiens prostaglandin-endoperoxide synthase 2 (prostaglandin G/H synthase and cyclooxygenase) (PTGS2), mRNA.                        | 1,6731             | Decrease          | 4,79E-05               |
| 8179481      | NM_019111       | RefSeq      | HLA-DRA     | Homo sapiens major histocompatibility complex, class II, DR alpha (HLA-DRA), mRNA.                                                       | 1,6706             | Decrease          | 0,002589227            |
| 8093156      | NM_007362       | RefSeq      | NCBP2       | Homo sapiens nuclear cap binding protein subunit 2, 20kDa (NCBP2), transcript variant 1, mRNA.                                           | 1,6695             | Decrease          | 0,000816225            |
| 7949465      | NM_021975       | RefSeq      | RELA        | Homo sapiens v-rel reticuloendotheliosis viral oncogene homolog A (avian) (RELA), transcript variant 1, mRNA.                            | 1,6667             | Decrease          | 2,17E-05               |
| 8046333      | NM_024843       | RefSeq      | CYBRD1      | Homo sapiens cytochrome b reductase 1 (CYBRD1), transcript variant 1, mRNA.                                                              | 1,6627             | Decrease          | 7,48E-05               |
| 7983111      | NM_003825       | RefSeq      | SNAP23      | Homo sapiens synaptosomal-associated protein, 23kDa (SNAP23), transcript variant 1, mRNA.                                                | 1,6621             | Decrease          | 6,68E-05               |
| 8082100      | NM_017554       | RefSeq      | PARP14      | Homo sapiens poly (ADP-ribose) polymerase family, member 14 (PARP14), mRNA.                                                              | 1,6614             | Decrease          | 0,001591119            |

| Probe Set ID | mRNA Accession  | mRNA Source | Gene Symbol | mRNA Description                                                                                                                             | Linear fold change | Increase/Decrease | p-value (non adjusted) |
|--------------|-----------------|-------------|-------------|----------------------------------------------------------------------------------------------------------------------------------------------|--------------------|-------------------|------------------------|
| 7917276      | NM_012152       | RefSeq      | LPAR3       | Homo sapiens lysophosphatidic acid receptor 3 (LPAR3), mRNA.                                                                                 | 1.6811             | Decrease          | 0.000609168            |
| 8143327      | NM_022750       | RefSeq      | PARP12      | Homo sapiens poly (ADP-ribose) polymerase family, member 12 (PARP12), mRNA.                                                                  | 1.6592             | Decrease          | 0.000143855            |
| 8152668      | NM_014109       | RefSeq      | ATAD2       | Homo sapiens ATPase family, AAA domain containing 2 (ATAD2), mRNA.                                                                           | 1.6587             | Decrease          | 0.00012612             |
| 7983306      | NM_024908       | RefSeq      | WDR76       | Homo sapiens WD repeat domain 76 (WDR76), transcript variant 1, mRNA.                                                                        | 1.6572             | Decrease          | 7.56E-05               |
| 8127031      | NM_002388       | RefSeq      | MCM3        | Homo sapiens minichromosome maintenance complex component 3 (MCM3), mRNA.                                                                    | 1.6541             | Decrease          | 7.63E-05               |
| 7917255      | NM_014021       | RefSeq      | SSX2IP      | Homo sapiens synovial sarcoma, X breakpoint 2 interacting protein (SSX2IP), transcript variant 5, mRNA.                                      | 1.6501             | Decrease          | 0.00126609             |
| 8015769      | NR_027676       | RefSeq      | BRCA1       | Homo sapiens breast cancer 1, early onset (BRCA1), transcript variant 6, non-coding RNA.                                                     | 1.6491             | Decrease          | 0.000298836            |
| 8057418      | NM_152520       | RefSeq      | ZNF385B     | Homo sapiens zinc finger protein 385B (ZNF385B), transcript variant 1, mRNA.                                                                 | 1.6475             | Decrease          | 3.19E-05               |
| 7926821      | NM_001172303    | RefSeq      | MASTL       | Homo sapiens microtubule associated serine/threonine kinase-like (MASTL), transcript variant 1, mRNA.                                        | 1.6469             | Decrease          | 0.000706481            |
| 8033162      | NM_003685       | RefSeq      | KHSRP       | Homo sapiens KH-type splicing regulatory protein (KHSRP), mRNA.                                                                              | 1.6427             | Decrease          | 6.10E-05               |
| 7915775      | NM_005897       | RefSeq      | IPP         | Homo sapiens intracisternal A particle-promoted polypeptide (IPP), transcript variant 1, mRNA.                                               | 1.6423             | Decrease          | 4.80E-05               |
| 8156126      | NM_024945       | RefSeq      | RM11        | Homo sapiens RM11, RecQ mediated genome instability 1, homolog (S. cerevisiae) (RM11), mRNA.                                                 | 1.6420             | Decrease          | 2.68E-05               |
| 8107307      | NM_001744       | RefSeq      | CAMK4       | Homo sapiens calcium/calmodulin-dependent protein kinase IV (CAMK4), mRNA.                                                                   | 1.6396             | Decrease          | 0.000163942            |
| 8158250      | NM_016174       | RefSeq      | CERCAM      | Homo sapiens cerebral endothelial cell adhesion molecule (CERCAM), mRNA.                                                                     | 1.6372             | Decrease          | 2.27E-05               |
| 8114658      | NM_005219       | RefSeq      | DIAPH1      | Homo sapiens diaphanous homolog 1 (Drosophila) (DIAPH1), transcript variant 1, mRNA.                                                         | 1.6359             | Decrease          | 0.000210472            |
| 8138718      | NM_006735       | RefSeq      | HOXA2       | Homo sapiens homeobox A2 (HOXA2), mRNA.                                                                                                      | 1.6351             | Decrease          | 0.001553124            |
| 8054614      | NM_022662       | RefSeq      | ANAPC1      | Homo sapiens anaphase promoting complex subunit 1 (ANAPC1), mRNA.                                                                            | 1.6335             | Decrease          | 0.00160258             |
| 8006933      | NM_018944       | RefSeq      | C21orf45    | Homo sapiens chromosome 21 open reading frame 45 (C21orf45), mRNA.                                                                           | 1.6332             | Decrease          | 0.002030914            |
| 7904433      | NM_006623       | RefSeq      | PHGDH       | Homo sapiens phosphoglycerate dehydrogenase (PHGDH), mRNA.                                                                                   | 1.6321             | Decrease          | 3.69E-05               |
| 8026490      | NR_015379       | RefSeq      | UCA1        | Homo sapiens urothelial cancer associated 1 (non-protein coding) (UCA1), non-coding RNA.                                                     | 1.6311             | Decrease          | 0.001939126            |
| 8160332      | NM_004529       | RefSeq      | MLLT3       | Homo sapiens myeloid/lymphoid or mixed-lineage leukemia (trithorax homolog, Drosophila); translocated to, 3 (MLLT3), mRNA.                   | 1.6306             | Decrease          | 0.000379981            |
| 8135378      | NM_002736       | RefSeq      | PRKAR2B     | Homo sapiens protein kinase, cAMP-dependent, regulatory, type II, beta (PRKAR2B), mRNA.                                                      | 1.6294             | Decrease          | 0.000178568            |
| 7908940      | NM_001001396    | RefSeq      | ATP2B4      | Homo sapiens ATPase, Ca++ transporting, plasma membrane 4 (ATP2B4), transcript variant 1, mRNA.                                              | 1.6277             | Decrease          | 0.000759803            |
| 8095139      | NM_024592       | RefSeq      | SRD5A3      | Homo sapiens steroid 5 alpha-reductase 3 (SRD5A3), mRNA.                                                                                     | 1.6265             | Decrease          | 0.000169832            |
| 8090193      | NM_020733       | RefSeq      | HEG1        | Homo sapiens HEG homolog 1 (zebrafish) (HEG1), mRNA.                                                                                         | 1.6260             | Decrease          | 9.24E-05               |
| 8092640      | NM_002916       | RefSeq      | RFC4        | Homo sapiens replication factor C (activator 1) 4, 37kDa (RFC4), transcript variant 1, mRNA.                                                 | 1.6255             | Decrease          | 0.000139579            |
| 8128867      | NM_015076       | RefSeq      | CDK19       | Homo sapiens cyclin-dependent kinase 19 (CDK19), mRNA.                                                                                       | 1.6243             | Decrease          | 0.000437919            |
| 8138824      | NM_014766       | RefSeq      | SCRN1       | Homo sapiens secernin 1 (SCRN1), transcript variant 2, mRNA.                                                                                 | 1.6242             | Decrease          | 0.000267934            |
| 8145555      | NM_016240       | RefSeq      | SCARA3      | Homo sapiens scavenger receptor class A, member 3 (SCARA3), transcript variant 1, mRNA.                                                      | 1.6238             | Decrease          | 7.61E-05               |
| 8010426      | NM_020914       | RefSeq      | RNF213      | Homo sapiens ring finger protein 213 (RNF213), transcript variant 1, mRNA.                                                                   | 1.6227             | Decrease          | 0.005407741            |
| 7915882      | NM_014774       | RefSeq      | KIAA0494    | Homo sapiens KIAA0494 (KIAA0494), mRNA.                                                                                                      | 1.6219             | Decrease          | 0.000782953            |
| 7987536      | NM_018145       | RefSeq      | FAM82A2     | Homo sapiens family with sequence similarity 82, member A2 (FAM82A2), mRNA.                                                                  | 1.6217             | Decrease          | 0.000816372            |
| 8085754      | NM_001012410    | RefSeq      | SGOL1       | Homo sapiens shugoshin-like 1 (S. pombe) (SGOL1), transcript variant A2, mRNA.                                                               | 1.6207             | Decrease          | 0.00211326             |
| 8043036      | NR_033423       | RefSeq      | LOC1720     | Homo sapiens dihydrofolate reductase pseudogene (LOC1720), non-coding RNA.                                                                   | 1.6200             | Decrease          | 7.03E-05               |
| 7939150      | NM_024081       | RefSeq      | PRRG4       | Homo sapiens proline rich Gla (G-carboxyglutamic acid) 4 (transmembrane) (PRRG4), mRNA.                                                      | 1.6188             | Decrease          | 0.00012259             |
| 7983843      | NM_207036       | RefSeq      | TCF12       | Homo sapiens transcription factor 12 (TCF12), transcript variant 1, mRNA.                                                                    | 1.6168             | Decrease          | 0.004948852            |
| 8107940      | ENST00000365663 | ENSEMBL     | ---         | ncrna:misc_RNA chromosome:GRCh37:5:131803839:131803949:1 gene:ENSG00000202533                                                                | 1.6148             | Decrease          | 0.001278496            |
| 8066074      | NM_001145316    | RefSeq      | DSN1        | Homo sapiens DSN1, MIND kinetochore complex component, homolog (S. cerevisiae) (DSN1), transcript variant 1, mRNA.                           | 1.6138             | Decrease          | 0.000195972            |
| 7982829      | NM_181642       | RefSeq      | SPINT1      | Homo sapiens serine peptidase inhibitor, Kunitz type 1 (SPINT1), transcript variant 1, mRNA.                                                 | 1.6129             | Decrease          | 0.000609757            |
| 8058390      | NM_213589       | RefSeq      | RAPH1       | Homo sapiens Ras association (RalGDS/AF-6) and pleckstrin homology domains 1 (RAPH1), transcript variant 1, mRNA.                            | 1.6098             | Decrease          | 0.000272179            |
| 7917866      | NM_001042517    | RefSeq      | DIAPH3      | Homo sapiens diaphanous homolog 3 (Drosophila) (DIAPH3), transcript variant 1, mRNA.                                                         | 1.6087             | Decrease          | 0.000294508            |
| 8045637      | NM_004522       | RefSeq      | KIF5C       | Homo sapiens kinesin family member 5C (KIF5C), mRNA.                                                                                         | 1.6077             | Decrease          | 0.005478835            |
| 8118086      | NM_007109       | RefSeq      | TCF19       | Homo sapiens transcription factor 19 (TCF19), transcript variant 1, mRNA.                                                                    | 1.6075             | Decrease          | 0.000172546            |
| 8177947      | NM_007109       | RefSeq      | TCF19       | Homo sapiens transcription factor 19 (TCF19), transcript variant 1, mRNA.                                                                    | 1.6075             | Decrease          | 0.000172546            |
| 8094609      | NM_138389       | RefSeq      | FAM114A1    | Homo sapiens family with sequence similarity 114, member A1 (FAM114A1), transcript variant 1, mRNA.                                          | 1.6067             | Decrease          | 0.000128949            |
| 8168472      | NM_000052       | RefSeq      | ATP7A       | Homo sapiens ATPase, Cu++ transporting, alpha polypeptide (ATP7A), mRNA.                                                                     | 1.6066             | Decrease          | 0.001058743            |
| 8179228      | NM_007109       | RefSeq      | TCF19       | Homo sapiens transcription factor 19 (TCF19), transcript variant 1, mRNA.                                                                    | 1.6066             | Decrease          | 0.000170996            |
| 7956271      | NM_003725       | RefSeq      | HSD17B6     | Homo sapiens hydroxysteroid (17-beta) dehydrogenase 6 homolog (mouse) (HSD17B6), mRNA.                                                       | 1.6058             | Decrease          | 0.000177474            |
| 7964271      | NM_000946       | RefSeq      | PRIM1       | Homo sapiens primase, DNA, polypeptide 1 (49kDa) (PRIM1), mRNA.                                                                              | 1.6050             | Decrease          | 4.08E-05               |
| 8147132      | NM_000067       | RefSeq      | CA2         | Homo sapiens carbonic anhydrase II (CA2), mRNA.                                                                                              | 1.6039             | Decrease          | 7.95E-05               |
| 7963750      | NM_012117       | RefSeq      | CBX5        | Homo sapiens chromobox homolog 5 (HP1 alpha homolog, Drosophila) (CBX5), transcript variant 3, mRNA.                                         | 1.5981             | Decrease          | 0.000189698            |
| 8145122      | NM_001128431    | RefSeq      | SLC39A14    | Homo sapiens solute carrier family 39 (zinc transporter), member 14 (SLC39A14), transcript variant 1, mRNA.                                  | 1.5956             | Decrease          | 0.000416796            |
| 7972003      | NM_007249       | RefSeq      | KLF12       | Homo sapiens Kruppel-like factor 12 (KLF12), mRNA.                                                                                           | 1.5873             | Decrease          | 0.000400401            |
| 7969651      | NM_006260       | RefSeq      | DNAJC3      | Homo sapiens DnaJ (Hsp40) homolog, subfamily C, member 3 (DNAJC3), mRNA.                                                                     | 1.5862             | Decrease          | 0.000832697            |
| 8103563      | NM_017631       | RefSeq      | DDX60       | Homo sapiens DEAD (Asp-Glu-Ala-Asp) box polypeptide 60 (DDX60), mRNA.                                                                        | 1.5853             | Decrease          | 0.001855906            |
| 7989501      | NM_001218       | RefSeq      | CA12        | Homo sapiens carbonic anhydrase XII (CA12), transcript variant 1, mRNA.                                                                      | 1.5851             | Decrease          | 3.08E-05               |
| 8101449      | NM_006665       | RefSeq      | HPSE        | Homo sapiens heparanase (HPSE), transcript variant 1, mRNA.                                                                                  | 1.5781             | Decrease          | 6.44E-05               |
| 8174985      | NM_003069       | RefSeq      | SMARCA1     | Homo sapiens SWI/SNF related, matrix associated, actin dependent regulator of chromatin, subfamily a, member 1 (SMARCA1), transcript vari    | 1.5780             | Decrease          | 0.002113044            |
| 7974920      | NM_182914       | RefSeq      | SYNE2       | Homo sapiens spectrin repeat containing, nuclear envelope 2 (SYNE2), transcript variant 5, mRNA.                                             | 1.5780             | Decrease          | 0.007589996            |
| 8096919      | NM_025144       | RefSeq      | ALPK1       | Homo sapiens alpha-kinase 1 (ALPK1), transcript variant 1, mRNA.                                                                             | 1.5767             | Decrease          | 0.001722682            |
| 8125328      | NM_006411       | RefSeq      | AGPAT1      | Homo sapiens 1-acylglycerol-3-phosphate O-acyltransferase 1 (lysophosphatidic acid acyltransferase, alpha) (AGPAT1), transcript variant 1, m | 1.5766             | Decrease          | 0.000119448            |
| 8178762      | NM_006411       | RefSeq      | AGPAT1      | Homo sapiens 1-acylglycerol-3-phosphate O-acyltransferase 1 (lysophosphatidic acid acyltransferase, alpha) (AGPAT1), transcript variant 1, m | 1.5766             | Decrease          | 0.000119448            |
| 8179958      | NM_006411       | RefSeq      | AGPAT1      | Homo sapiens 1-acylglycerol-3-phosphate O-acyltransferase 1 (lysophosphatidic acid acyltransferase, alpha) (AGPAT1), transcript variant 1, m | 1.5766             | Decrease          | 0.000119448            |
| 8110147      | NM_198567       | RefSeq      | C5orf25     | Homo sapiens chromosome 5 open reading frame 25 (C5orf25), mRNA.                                                                             | 1.5763             | Decrease          | 0.001066903            |
| 8097356      | NM_014264       | RefSeq      | PLK4        | Homo sapiens polo-like kinase 4 (Drosophila) (PLK4), mRNA.                                                                                   | 1.5762             | Decrease          | 0.000382028            |



| Probe Set ID | mRNA Accession | mRNA Source | Gene Symbol | mRNA Description                                                                                                             | Linear fold change | Increase/Decrease | p-value (non adjusted) |
|--------------|----------------|-------------|-------------|------------------------------------------------------------------------------------------------------------------------------|--------------------|-------------------|------------------------|
| 7951535      | NM_153705      | RefSeq      | KDEL2C      | Homo sapiens KDEL (Lys-Asp-Glu-Leu) containing 2 (KDEL2C), mRNA.                                                             | 1.5754             | Decrease          | 0.001353799            |
| 7936559      | NM_173791      | RefSeq      | PDZD8       | Homo sapiens PDZ domain containing 8 (PDZD8), mRNA.                                                                          | 1.5753             | Decrease          | 0.000335662            |
| 8035958      | NM_032816      | RefSeq      | CCDC123     | Homo sapiens coiled-coil domain containing 123 (CCDC123), mRNA.                                                              | 1.5718             | Decrease          | 0.000358132            |
| 8050875      | NM_018263      | RefSeq      | ASXL2       | Homo sapiens additional sex combs like 2 (Drosophila) (ASXL2), mRNA.                                                         | 1.5692             | Decrease          | 0.000721335            |
| 7945031      | ---            | ---         | ---         | ---                                                                                                                          | 1.5683             | Decrease          | 0.000182346            |
| 7904106      | NM_152900      | RefSeq      | MAGI3       | Homo sapiens membrane associated guanylate kinase, WW and PDZ domain containing 3 (MAGI3), transcript variant 2, mRNA.       | 1.5645             | Decrease          | 0.001107063            |
| 8096004      | NM_198892      | RefSeq      | BMP2K       | Homo sapiens BMP2 inducible kinase (BMP2K), transcript variant 1, mRNA.                                                      | 1.5644             | Decrease          | 0.001815977            |
| 8068478      | NM_005441      | RefSeq      | CHAF1B      | Homo sapiens chromatin assembly factor 1, subunit B (p60) (CHAF1B), mRNA.                                                    | 1.5641             | Decrease          | 4.57E-05               |
| 8142886      | NM_003344      | RefSeq      | UBE2H       | Homo sapiens ubiquitin-conjugating enzyme E2H (UBC8 homolog, yeast) (UBE2H), transcript variant 1, mRNA.                     | 1.5639             | Decrease          | 0.000212683            |
| 7951545      | NM_015065      | RefSeq      | EXPH5       | Homo sapiens exophilin 5 (EXPH5), transcript variant 1, mRNA.                                                                | 1.5635             | Decrease          | 0.005382748            |
| 8150287      | NM_023034      | RefSeq      | WHSC1L1     | Homo sapiens Wolf-Hirschhorn syndrome candidate 1-like 1 (WHSC1L1), transcript variant long, mRNA.                           | 1.5631             | Decrease          | 0.000768595            |
| 8077731      | NM_033084      | RefSeq      | FANCD2      | Homo sapiens Fanconi anemia, complementation group D2 (FANCD2), transcript variant 1, mRNA.                                  | 1.5625             | Decrease          | 0.000458884            |
| 7903162      | NM_152487      | RefSeq      | TMEM56      | Homo sapiens transmembrane protein 56 (TMEM56), mRNA.                                                                        | 1.5607             | Decrease          | 0.000963598            |
| 7924107      | NM_014873      | RefSeq      | LPGAT1      | Homo sapiens lysophosphatidylglycerol acyltransferase 1 (LPGAT1), mRNA.                                                      | 1.5595             | Decrease          | 0.000277299            |
| 8121277      | NM_001624      | RefSeq      | AIM1        | Homo sapiens absent in melanoma 1 (AIM1), mRNA.                                                                              | 1.5588             | Decrease          | 0.000236732            |
| 7923086      | NM_018136      | RefSeq      | ASP         | Homo sapiens asp (abnormal spindle) homolog, microcephaly associated (Drosophila) (ASP), mRNA.                               | 1.5584             | Decrease          | 0.000208233            |
| 8095680      | NM_000584      | RefSeq      | IL8         | Homo sapiens interleukin 8 (IL8), mRNA.                                                                                      | 1.5574             | Decrease          | 0.005278981            |
| 7986068      | NM_000057      | RefSeq      | BLM         | Homo sapiens Bloom syndrome, RecQ helicase-like (BLM), mRNA.                                                                 | 1.5571             | Decrease          | 0.000138203            |
| 8144036      | NM_005431      | RefSeq      | XRCC2       | Homo sapiens X-ray repair complementing defective repair in Chinese hamster cells 2 (XRCC2), mRNA.                           | 1.5569             | Decrease          | 0.000113317            |
| 7958031      | AK302724       | GenBank     | C12orf48    | Homo sapiens cDNA FLJ57674 complete cds.                                                                                     | 1.5562             | Decrease          | 0.000656958            |
| 8005475      | NM_001037330   | RefSeq      | TRIM16L     | Homo sapiens tripartite motif-containing 16-like (TRIM16L), mRNA.                                                            | 1.5558             | Decrease          | 4.94E-05               |
| 8172088      | NM_001123385   | RefSeq      | BCOR        | Homo sapiens BCL6 co-repressor (BCOR), transcript variant 5, mRNA.                                                           | 1.5554             | Decrease          | 0.000384147            |
| 8144153      | NM_017760      | RefSeq      | NCAPG2      | Homo sapiens non-SMC condensin II complex, subunit G2 (NCAPG2), mRNA.                                                        | 1.5552             | Decrease          | 0.000116208            |
| 8109436      | ---            | ---         | ---         | ---                                                                                                                          | 1.5548             | Decrease          | 0.004080052            |
| 7999102      | NM_003223      | RefSeq      | TFAP4       | Homo sapiens transcription factor AP-4 (activating enhancer binding protein 4) (TFAP4), mRNA.                                | 1.5543             | Decrease          | 0.00014936             |
| 8041636      | ---            | ---         | ---         | ---                                                                                                                          | 1.5541             | Decrease          | 0.004409537            |
| 7957850      | NM_174942      | RefSeq      | GAS2L3      | Homo sapiens growth arrest-specific 2 like 3 (GAS2L3), mRNA.                                                                 | 1.5531             | Decrease          | 0.001222078            |
| 7923189      | NM_014875      | RefSeq      | KIF14       | Homo sapiens kinesin family member 14 (KIF14), mRNA.                                                                         | 1.5528             | Decrease          | 0.002444951            |
| 8022747      | NM_004775      | RefSeq      | B4GALT6     | Homo sapiens UDP-Gal:betaGlcNAc beta 1,4-galactosyltransferase, polypeptide 6 (B4GALT6), mRNA.                               | 1.5521             | Decrease          | 0.003096691            |
| 8127109      | NM_016513      | RefSeq      | ICK         | Homo sapiens intestinal cell (MAK-like) kinase (ICK), transcript variant 2, mRNA.                                            | 1.5510             | Decrease          | 0.002253105            |
| 8146717      | NM_013257      | RefSeq      | SGK3        | Homo sapiens serum/glucocorticoid regulated kinase family, member 3 (SGK3), transcript variant 1, mRNA.                      | 1.5453             | Decrease          | 0.001281512            |
| 7929816      | NM_005063      | RefSeq      | SCD         | Homo sapiens stearoyl-CoA desaturase (delta-9-desaturase) (SCD), mRNA.                                                       | 1.5451             | Decrease          | 0.000368376            |
| 7999384      | AF258574       | GenBank     | ---         | Homo sapiens PP4135 mRNA, complete cds.                                                                                      | 1.5449             | Decrease          | 0.005468342            |
| 8154951      | NM_002065      | RefSeq      | GLUL        | Homo sapiens glutamate-ammonia ligase (GLUL), transcript variant 1, mRNA.                                                    | 1.5445             | Decrease          | 0.000139684            |
| 8118548      | NM_019111      | RefSeq      | HLA-DRA     | Homo sapiens major histocompatibility complex, class II, DR alpha (HLA-DRA), mRNA.                                           | 1.5442             | Decrease          | 0.002681551            |
| 7934133      | NM_021129      | RefSeq      | PPA1        | Homo sapiens pyrophosphatase (inorganic) 1 (PPA1), mRNA.                                                                     | 1.5435             | Decrease          | 0.000670519            |
| 8099860      | NM_002913      | RefSeq      | RFC1        | Homo sapiens replication factor C (activator 1) 1, 145kDa (RFC1), mRNA.                                                      | 1.5421             | Decrease          | 0.000674172            |
| 7932082      | NM_031455      | RefSeq      | CCDC3       | Homo sapiens coiled-coil domain containing 3 (CCDC3), mRNA.                                                                  | 1.5419             | Decrease          | 0.000135444            |
| 8113157      | NM_014639      | RefSeq      | TTC37       | Homo sapiens tetratricopeptide repeat domain 37 (TTC37), mRNA.                                                               | 1.5418             | Decrease          | 0.000615357            |
| 8169473      | NM_005032      | RefSeq      | PLS3        | Homo sapiens plastin 3 (PLS3), transcript variant 1, mRNA.                                                                   | 1.5418             | Decrease          | 0.00110091             |
| 8121444      | NM_003472      | RefSeq      | DEK         | Homo sapiens DEK oncogene (DEK), transcript variant 1, mRNA.                                                                 | 1.5403             | Decrease          | 0.000570956            |
| 7944493      | NM_005188      | RefSeq      | CBL         | Homo sapiens Cas-Br-M (murine) ecotropic retroviral transforming sequence (CBL), mRNA.                                       | 1.5385             | Decrease          | 0.001048508            |
| 8023191      | NM_005901      | RefSeq      | SMAD2       | Homo sapiens SMAD family member 2 (SMAD2), transcript variant 1, mRNA.                                                       | 1.5383             | Decrease          | 0.001818446            |
| 8090866      | NR_024400      | RefSeq      | ANAPC13     | Homo sapiens anaphase promoting complex subunit 13 (ANAPC13), transcript variant 2, non-coding RNA.                          | 1.5383             | Decrease          | 0.000135402            |
| 8145470      | NM_001386      | RefSeq      | DPYSL2      | Homo sapiens dihydropyrimidinase-like 2 (DPYSL2), mRNA.                                                                      | 1.5382             | Decrease          | 0.000904353            |
| 7920243      | NM_014787      | RefSeq      | DNAJC6      | Homo sapiens DnaJ (Hsp40) homolog, subfamily C, member 6 (DNAJC6), mRNA.                                                     | 1.5374             | Decrease          | 0.003129719            |
| 8163328      | NM_001146108   | RefSeq      | PTGR1       | Homo sapiens prostaglandin reductase 1 (PTGR1), transcript variant 1, mRNA.                                                  | 1.5374             | Decrease          | 0.000185302            |
| 8146986      | NM_004133      | RefSeq      | HNF4G       | Homo sapiens hepatocyte nuclear factor 4, gamma (HNF4G), mRNA.                                                               | 1.5369             | Decrease          | 0.000132517            |
| 7968484      | NM_000059      | RefSeq      | BRCA2       | Homo sapiens breast cancer 2, early onset (BRCA2), mRNA.                                                                     | 1.5345             | Decrease          | 0.003460485            |
| 7920766      | NM_018489      | RefSeq      | ASH1L       | Homo sapiens ash1 (absent, small, or homeotic)-like (Drosophila) (ASH1L), mRNA.                                              | 1.5337             | Decrease          | 0.001822309            |
| 8041383      | NM_206943      | RefSeq      | LTBP1       | Homo sapiens latent transforming growth factor beta binding protein 1 (LTBP1), transcript variant 1, mRNA.                   | 1.5328             | Decrease          | 0.000213878            |
| 8060813      | NM_032485      | RefSeq      | MCM8        | Homo sapiens minichromosome maintenance complex component 8 (MCM8), transcript variant 1, mRNA.                              | 1.5325             | Decrease          | 0.006545693            |
| 8035905      | NM_032139      | RefSeq      | ANKRD27     | Homo sapiens ankyrin repeat domain 27 (VPS9 domain) (ANKRD27), mRNA.                                                         | 1.5325             | Decrease          | 7.25E-05               |
| 8147351      | NM_017697      | RefSeq      | ESRP1       | Homo sapiens epithelial splicing regulatory protein 1 (ESRP1), transcript variant 1, mRNA.                                   | 1.5322             | Decrease          | 0.000287246            |
| 7901192      | NM_003579      | RefSeq      | RAD54L      | Homo sapiens RAD54-like (S. cerevisiae) (RAD54L), transcript variant 1, mRNA.                                                | 1.5306             | Decrease          | 8.91E-05               |
| 8011275      | NM_024086      | RefSeq      | METT10D     | Homo sapiens methyltransferase 10 domain containing (METT10D), mRNA.                                                         | 1.5286             | Decrease          | 0.000165929            |
| 7950307      | NM_003355      | RefSeq      | UCP2        | Homo sapiens uncoupling protein 2 (mitochondrial, proton carrier) (UCP2), nuclear gene encoding mitochondrial protein, mRNA. | 1.5278             | Decrease          | 0.004199799            |
| 8067206      | BC137482       | GenBank     | CTCF        | Homo sapiens high-mobility group box 1-like 1, mRNA (cDNA clone MGC:169105 IMAGE:9021482), complete cds.                     | 1.5278             | Decrease          | 0.005844776            |
| 8155214      | NM_014791      | RefSeq      | MELK        | Homo sapiens maternal embryonic leucine zipper kinase (MELK), mRNA.                                                          | 1.5261             | Decrease          | 0.000221692            |
| 7951133      | NM_032427      | RefSeq      | MAML2       | Homo sapiens mastermind-like 2 (Drosophila) (MAML2), mRNA.                                                                   | 1.5248             | Decrease          | 0.004109101            |
| 7954527      | NM_020183      | RefSeq      | ARNTL2      | Homo sapiens aryl hydrocarbon receptor nuclear translocator-like 2 (ARNTL2), mRNA.                                           | 1.5248             | Decrease          | 0.001485644            |
| 8149720      | NM_004430      | RefSeq      | EGR3        | Homo sapiens early growth response 3 (EGR3), mRNA.                                                                           | 1.5218             | Decrease          | 0.000484234            |
| 7948898      | NR_002560      | RefSeq      | SNORD31     | Homo sapiens small nucleolar RNA, C/D box 31 (SNORD31), small nucleolar RNA.                                                 | 1.5218             | Decrease          | 0.000659639            |
| 8156848      | NM_006981      | RefSeq      | NR4A3       | Homo sapiens nuclear receptor subfamily 4, group A, member 3 (NR4A3), transcript variant 1, mRNA.                            | 1.5218             | Decrease          | 0.000918314            |
| 8166525      | NM_016937      | RefSeq      | POLA1       | Homo sapiens polymerase (DNA directed), alpha 1, catalytic subunit (POLA1), mRNA.                                            | 1.5204             | Decrease          | 0.000672041            |

| Probe Set ID | mRNA Accession | mRNA Source | Gene Symbol | mRNA Description                                                                                                                       | Linear fold change | Increase/Decrease | p-value (non adjusted) |
|--------------|----------------|-------------|-------------|----------------------------------------------------------------------------------------------------------------------------------------|--------------------|-------------------|------------------------|
| 7902400      | NR_002748      | RefSeq      | SNORD45B    | Homo sapiens small nucleolar RNA, C/D box 45B (SNORD45B), small nuclear RNA.                                                           | 1,5194             | Decrease          | 0,006838709            |
| 7961291      | NM_176885      | RefSeq      | TAS2R31     | Homo sapiens taste receptor, type 2, member 31 (TAS2R31), mRNA.                                                                        | 1,5178             | Decrease          | 0,003197907            |
| 8080964      | NM_001080393   | RefSeq      | GXYLT2      | Homo sapiens glucoside xylosyltransferase 2 (GXYLT2), mRNA.                                                                            | 1,5145             | Decrease          | 0,000441155            |
| 8105828      | NM_031966      | RefSeq      | CCNB1       | Homo sapiens cyclin B1 (CCNB1), mRNA.                                                                                                  | 1,5142             | Decrease          | 0,001720167            |
| 8151898      | NM_177965      | RefSeq      | C8orf37     | Homo sapiens chromosome 8 open reading frame 37 (C8orf37), mRNA.                                                                       | 1,5126             | Decrease          | 0,008057989            |
| 8169186      | NM_017752      | RefSeq      | TBC1D8B     | Homo sapiens TBC1 domain family, member 8B (with GRAM domain) (TBC1D8B), transcript variant 1, mRNA.                                   | 1,5124             | Decrease          | 0,000835286            |
| 8032491      | NM_032737      | RefSeq      | LMNB2       | Homo sapiens lamin B2 (LMNB2), mRNA.                                                                                                   | 1,5114             | Decrease          | 0,000280332            |
| 7916167      | NM_004153      | RefSeq      | ORC1L       | Homo sapiens origin recognition complex, subunit 1-like (yeast) (ORC1L), mRNA.                                                         | 1,5108             | Decrease          | 0,000174604            |
| 8071155      | NM_017414      | RefSeq      | USP18       | Homo sapiens ubiquitin specific peptidase 18 (USP18), mRNA.                                                                            | 1,5103             | Decrease          | 0,000157629            |
| 8041644      | NM_172069      | RefSeq      | PLEKHH2     | Homo sapiens pleckstrin homology domain containing, family H (with MyTH4 domain) member 2 (PLEKHH2), mRNA.                             | 1,5100             | Decrease          | 0,009671425            |
| 8166511      | NM_005391      | RefSeq      | PDK3        | Homo sapiens pyruvate dehydrogenase kinase, isozyme 3 (PDK3), nuclear gene encoding mitochondrial protein, transcript variant 2, mRNA. | 1,5088             | Decrease          | 0,001707821            |
| 8102468      | NM_003619      | RefSeq      | PRSS12      | Homo sapiens protease, serine, 12 (neurotrypsin, motopsin) (PRSS12), mRNA.                                                             | 1,5086             | Decrease          | 9,94E-05               |
| 8008629      | NM_003647      | RefSeq      | DGKE        | Homo sapiens diacylglycerol kinase, epsilon 64kDa (DGKE), mRNA.                                                                        | 1,5081             | Decrease          | 0,000897245            |
| 7954631      | NM_018099      | RefSeq      | FAR2        | Homo sapiens fatty acyl CoA reductase 2 (FAR2), mRNA.                                                                                  | 1,5069             | Decrease          | 0,000360254            |
| 7957737      | NM_001032283   | RefSeq      | TMPO        | Homo sapiens thymopoietin (TMPO), transcript variant 2, mRNA.                                                                          | 1,5067             | Decrease          | 0,000387009            |
| 8025672      | NM_020428      | RefSeq      | SLC44A2     | Homo sapiens solute carrier family 44, member 2 (SLC44A2), transcript variant 1, mRNA.                                                 | 1,5061             | Decrease          | 0,000224812            |
| 8144401      | NM_152250      | RefSeq      | DEFB105A    | Homo sapiens defensin, beta 105A (DEFB105A), mRNA.                                                                                     | 1,5060             | Decrease          | 0,000585875            |
| 8149235      | NM_152250      | RefSeq      | DEFB105A    | Homo sapiens defensin, beta 105A (DEFB105A), mRNA.                                                                                     | 1,5060             | Decrease          | 0,000585875            |
| 8170119      | NM_001159702   | RefSeq      | FHL1        | Homo sapiens four and a half LIM domains 1 (FHL1), transcript variant 1, mRNA.                                                         | 1,5050             | Decrease          | 0,000903746            |
| 7995697      | NM_017839      | RefSeq      | LPCAT2      | Homo sapiens lysophosphatidylcholine acyltransferase 2 (LPCAT2), mRNA.                                                                 | 1,5038             | Decrease          | 0,001568055            |
| 8180223      | NM_001010871.1 | ---         | ---         | Homo sapiens hypothetical protein LOC221442 (LOC221442), mRNA.                                                                         | 1,5033             | Decrease          | 0,00745883             |
| 7936408      | NM_014881      | RefSeq      | DCLRE1A     | Homo sapiens DNA cross-link repair 1A (PSO2 homolog, S. cerevisiae) (DCLRE1A), mRNA.                                                   | 1,5031             | Decrease          | 0,001081869            |
| 8003679      | NM_002945      | RefSeq      | RPA1        | Homo sapiens replication protein A1, 70kDa (RPA1), mRNA.                                                                               | 1,5026             | Decrease          | 8,06E-05               |
| 8132318      | NM_018685      | RefSeq      | ANLN        | Homo sapiens anillin, actin binding protein (ANLN), mRNA.                                                                              | 1,5016             | Decrease          | 0,000799571            |
| 8123181      | NM_000876      | RefSeq      | IGF2R       | Homo sapiens insulin-like growth factor 2 receptor (IGF2R), mRNA.                                                                      | 1,5014             | Decrease          | 0,000378636            |
| 8001197      | NM_018092      | RefSeq      | NETO2       | Homo sapiens neuropilin (NRP) and tolloid (TLL)-like 2 (NETO2), mRNA.                                                                  | 1,5007             | Decrease          | 0,003690414            |
| 8007446      | NM_005533      | RefSeq      | IFI35       | Homo sapiens interferon-induced protein 35 (IFI35), mRNA.                                                                              | 1,4997             | Decrease          | 0,0001361              |
