# Supplementary figures and images for: PTTG2 silencing results in induction of epithelial-to-mesenchymal transition and apoptosis
Source: PubMed Central journal article supplement — Cell Death Dis. 2013 Mar 7;4(3):e530–. doi: 10.1038/cddis.2013.48 (PMC3613826; doi:10.1038/cddis.2013.48), 2013-03-07

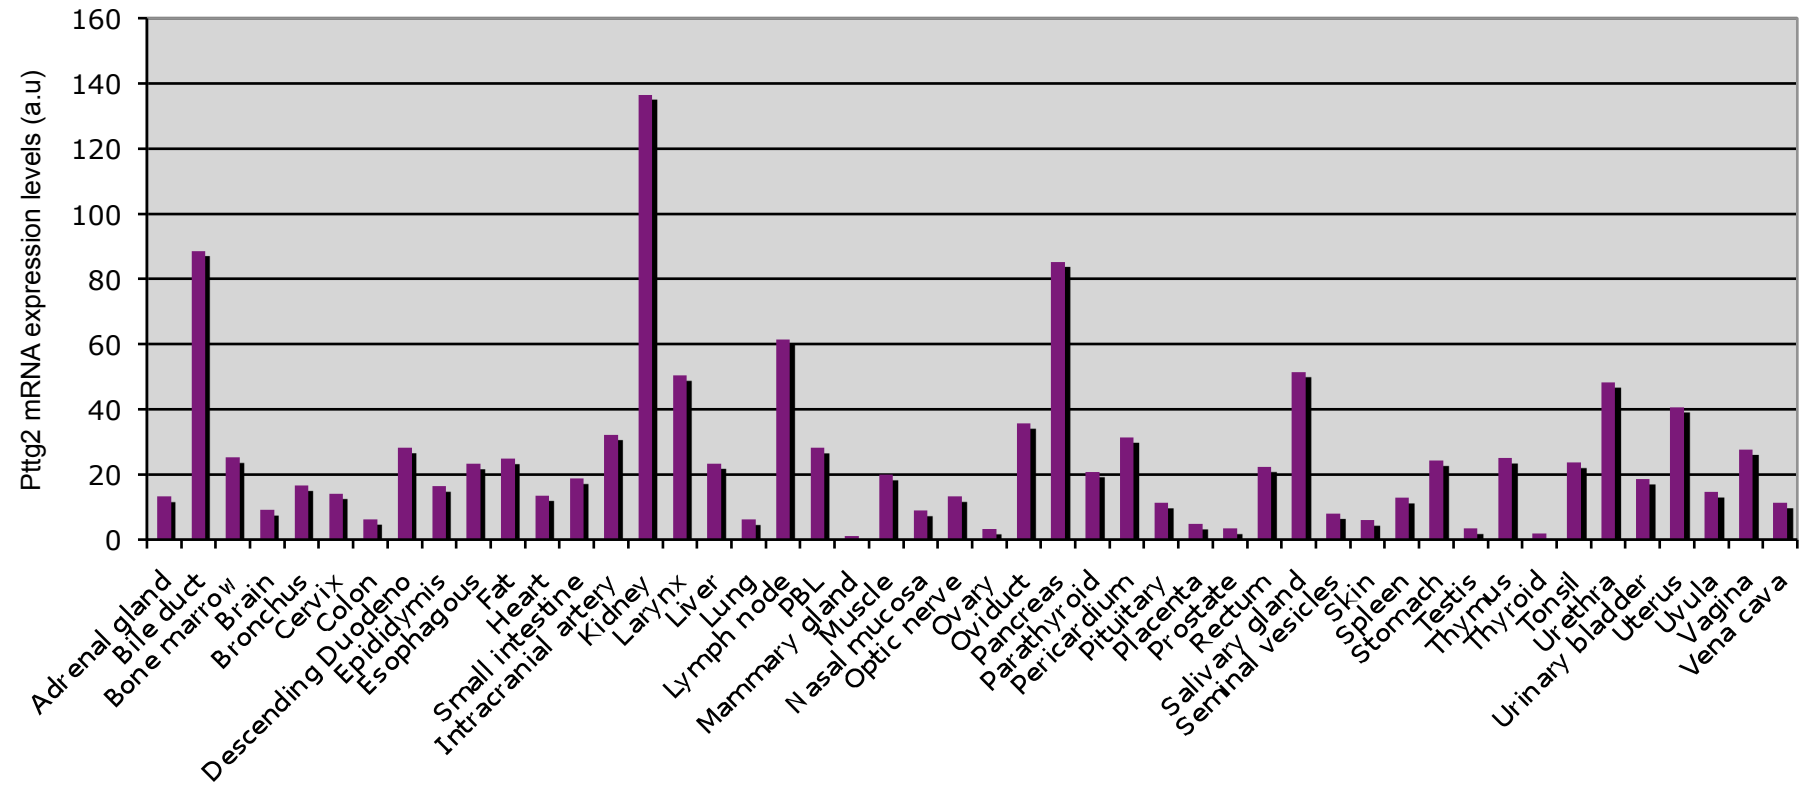

Figure S1

Supplement: cddis201348x1.pdf [file cddis201348x1.pdf]

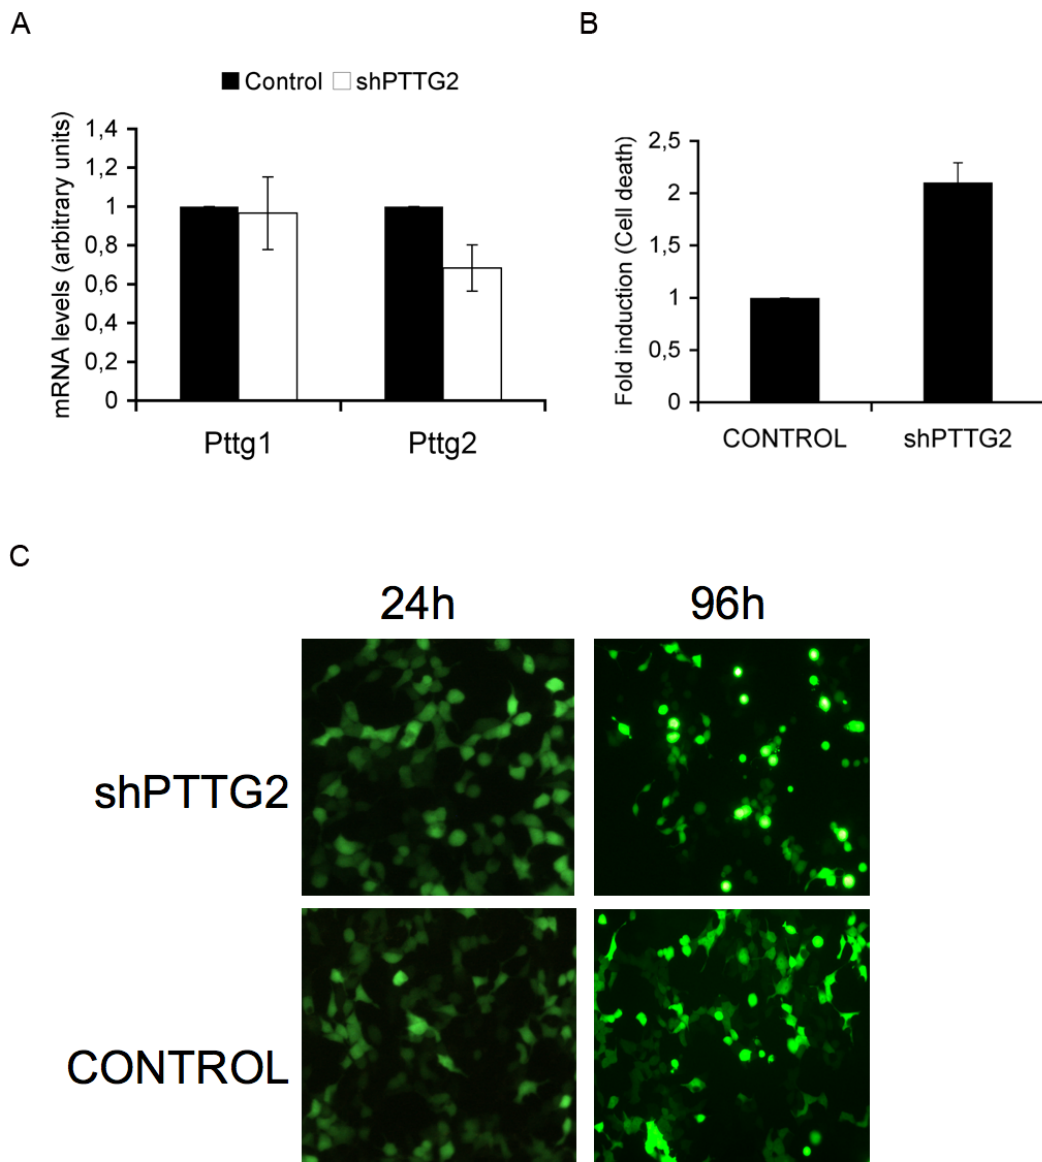

Figure S2

Supplement: cddis201348x2.pdf [file cddis201348x2.pdf]

A

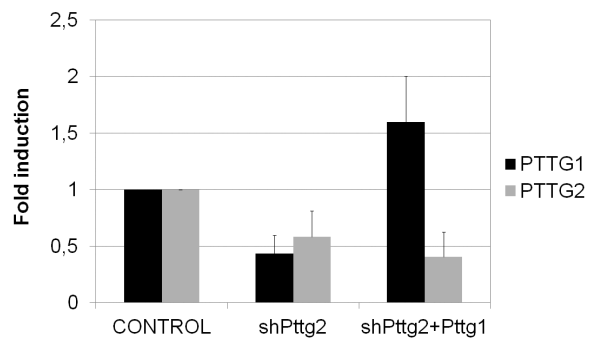

B

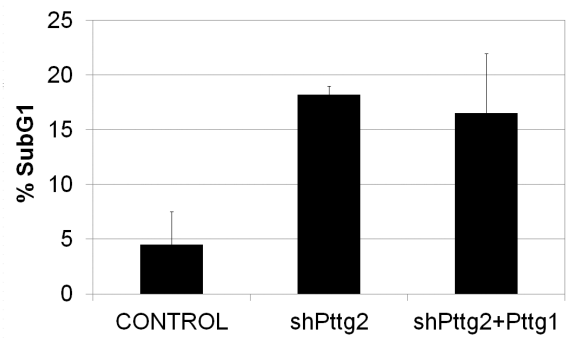

Figure S3

Supplement: cddis201348x3.pdf [file cddis201348x3.pdf]

HCT116

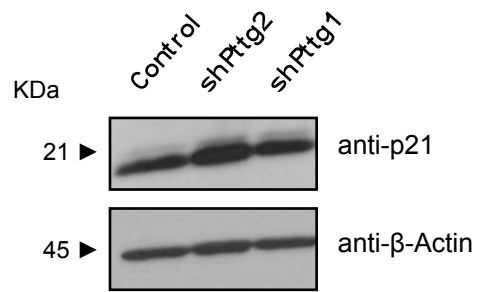

Figure S4

Supplement: cddis201348x4.pdf [file cddis201348x4.pdf]
